1 Title: Longitudinal metatranscriptomic sequencing of Southern California wastewater  
2 representing 16 million people from August 2020-21 reveals widespread transcription of  
3 antibiotic resistance genes.

4

5 Jason A. Rothman<sup>a#</sup>, Andrew Saghir<sup>a</sup>, Seung-Ah Chung<sup>b</sup>, Nicholas Boyajian<sup>a</sup>, Thao Dinh<sup>a</sup>,  
6 Jinwoo Kim<sup>a</sup>, Jordan Oval<sup>a</sup>, Vivek Sharavanan<sup>a</sup>, Courtney York<sup>a</sup>, Amity G. Zimmer-Faust<sup>c</sup>,  
7 Kylie Langlois<sup>c</sup>, Joshua A. Steele<sup>c</sup>, John F. Griffith<sup>c</sup>, Katrine L. Whiteson<sup>a#</sup>

8

9 <sup>a</sup> Department of Molecular Biology and Biochemistry, University of California, Irvine, Irvine,  
10 CA, USA.

11 <sup>b</sup> Genomics High-Throughput Facility, Department of Biological Chemistry, University of  
12 California, Irvine, Irvine, CA, USA.

13 <sup>c</sup> Southern California Coastal Water Research Project, Costa Mesa, CA, USA

14

15 # Co-corresponding authors: Jason A. Rothman, University of California, Irvine, Irvine, CA,  
16 92697, (949) 824-3509, rothmanj@uci.edu. Katrine L. Whiteson, University of California,  
17 Irvine, Irvine, CA, 92697, (949) 824-9032, katrine@uci.edu.

18 Abstract:

19           Municipal wastewater provides a representative sample of human fecal waste across a  
20 catchment area and contains a wide diversity of microbes. Sequencing wastewater samples  
21 provides information about human-associated and medically-important microbial populations,  
22 and may be useful to assay disease prevalence and antimicrobial resistance (AMR).

23           Here, we present a study in which we used untargeted metatranscriptomic sequencing on  
24 RNA extracted from 275 sewage influent samples obtained from eight wastewater treatment  
25 plants (WTPs) representing approximately 16 million people in Southern California between  
26 August 2020 – August 2021. We characterized bacterial and viral transcripts, assessed metabolic  
27 pathway activity, and identified over 2,000 AMR genes/variants across all samples. Because we  
28 did not deplete ribosomal RNA, we have a unique window into AMR carried as ribosomal  
29 mutants. We show that AMR diversity varied between WTPs and that the relative abundance of  
30 many individual AMR genes/variants increased over time and may be connected to antibiotic use  
31 during the COVID-19 pandemic. Similarly, we detected transcripts mapping to human  
32 pathogenic bacteria and viruses suggesting RNA sequencing is a powerful tool for wastewater-  
33 based epidemiology and that there are geographical signatures to microbial transcription. We  
34 captured the transcription of gene pathways common to bacterial cell processes, including central  
35 carbon metabolism, nucleotide synthesis/salvage, and amino acid biosynthesis. We also posit that  
36 due to the ubiquity of many viruses and bacteria in wastewater, new biological targets for  
37 microbial water quality assessment can be developed.

38           To the best of our knowledge, our study provides the most complete longitudinal  
39 metatranscriptomic analysis of a large population's wastewater to date and demonstrates our  
40 ability to monitor the presence and activity of microbes in complex samples. By sequencing

41 RNA, we can track the relative abundance of expressed AMR genes/variants and metabolic  
42 pathways, increasing our understanding of AMR activity across large human populations and  
43 sewer sheds.

44

45 Keywords: Wastewater, antimicrobial resistance, metatranscriptomics, microbial ecology,  
46 environmental microbiology.

47

48 1. Introduction:

49 Wastewater harbors a wide diversity of microorganisms and represents the collective  
50 waste of human activity across a sewershed (Newton and McClary, 2019). Over 300 km<sup>3</sup> of  
51 wastewater is produced globally, of which most is channeled into wastewater treatment plants  
52 (WTPs) for biological and chemical processing (Lu et al., 2018). As a heterogenous mixture,  
53 wastewater has been shown to contain microbial communities that vary depending on sampling  
54 location, time of year, industry, agriculture, and the health of the served human population  
55 (Cantalupo et al., 2011; Edwards et al., 2019; McLellan et al., 2010; Symonds et al., 2009; Wu et  
56 al., 2019). As a result, the microbial water quality of wastewater can be a useful indicator of an  
57 area's biological contamination, with outbreaks of several diseases corresponding to increased  
58 wastewater titers of pathogenic etiological agents (Hellmér et al., 2014; Manor et al., 1999;  
59 Rothman et al., 2021; Wu et al., 2020). The microbial ecology of wastewater is an important  
60 topic, with many studies characterizing the microbes present through culturing, PCR- and  
61 sequencing-based methods, and generally rely on targeting specific pathogens or metagenomic  
62 shotgun DNA sequencing (Hubeny et al., 2022; Jankowski et al., 2022; Kitajima et al., 2018;  
63 Martínez-Puchol et al., 2020). While useful, these studies are unable to capture microbial  
64 transcription, which provides information about active microbial processes, instead of the  
65 genomic potential of wastewater. Moreover, as many important human and crop/livestock  
66 pathogens are RNA viruses (Amoah et al., 2020; Bibby and Peccia, 2013; Symonds et al., 2009),  
67 we can monitor the presence and spread of *Ribovira* through untargeted metatranscriptomics.  
68 Wastewater RNA sequencing can uncover active microbial interactions and metabolic networks,  
69 which may inform us of the public and environmental health of the areas served by a given

70 sewage system (Brumfield et al., 2022; Crits-Christoph et al., 2021; Li et al., 2022; Rothman et  
71 al., 2021).

72 Wastewater-based epidemiology (WBE) can inform public health about the presence of  
73 pathogens in a population without needing to test individuals in healthcare settings (Bivins et al.,  
74 2020; Sims and Kasprzyk-Hordern, 2020). Health agencies have used WBE to detect the  
75 presence of human pathogens such as norovirus, polio, SARS coronaviruses, and a variety of  
76 bacteria and protists (Hellmér et al., 2014; Manor et al., 1999; Rothman et al., 2021; Wu et al.,  
77 2020). For example, WBE has been heavily used to track and monitor the abundance and spread  
78 of SARS-CoV-2 during the ongoing COVID-19 pandemic at various population levels (Achak et  
79 al., 2021; Karthikeyan et al., 2021; Nemudryi et al., 2020; Peccia et al., 2020; Rothman et al.,  
80 2021; Wu et al., 2020). Furthermore, as disease case counts change longitudinally, multiple time  
81 points and RNA sequencing are useful to track not only the presence, but the activity of  
82 microorganisms which may provide additional information about pathogens over longer time  
83 periods (Faust et al., 2015; Joseph et al., 2019; Marcelino et al., 2019; Nemudryi et al., 2020).  
84 Lastly, by broadly sequencing RNA, we may be able to discover new targets for microbial water  
85 quality assays in order to detect and monitor for sewage contamination of the environment and  
86 water sources (Cao et al., 2015; Farkas et al., 2019; Jiang et al., 2022; Kitajima et al., 2018;  
87 Zimmer-Faust et al., 2021).

88 Antimicrobial resistance (AMR) is a worldwide concern that inhibits effective treatment  
89 of disease and increases healthcare burden and morbidity of infections (World Health  
90 Organization, 2021). Wastewater contains a complex diversity of AMR genes, which allows for  
91 horizontal gene transfer (HGT) between antimicrobial resistant organisms and those species or  
92 strains that are currently susceptible to antimicrobial therapies (Joseph et al., 2019; Ju et al.,

93 2019; Sims and Kasprzyk-Hordern, 2020). As AMR and HGT are important to monitor for  
94 public and agricultural health, many studies have employed sequencing and targeted PCR-based  
95 technologies to assay the AMR genomic content of wastewater (Karkman et al., 2018). While  
96 useful, these studies typically rely on DNA-based technologies which cannot measure the  
97 transcriptional activity of these genes or the organisms that harbor AMR, and may better indicate  
98 the severity and abundance of antimicrobial resistant infections across a population (de Nies et  
99 al., 2021; Ju et al., 2019; Marcelino et al., 2019). By employing RNA-sequencing, we are better  
100 able to understand the disease ecology and AMR activity of wastewater-inhabiting organisms  
101 and those deposited through the waste stream, and the specific mutations that cause AMR  
102 (Alcock et al., 2020). Lastly, through careful sampling, changes in AMR transcription can be  
103 tracked over time, likely providing finer-scale information about the severity and seasonality of  
104 AMR infections during the ongoing COVID-19 pandemic (Langford et al., 2020; Rose et al.,  
105 2021).

106         Studying wastewater microbial ecology and tracking the activity of disease-associated  
107 microbes and AMR is vital to public health and environmental monitoring. In this study, we used  
108 metatranscriptomic sequencing to characterize the RNA world of 275 samples across eight  
109 wastewater treatment plants (WTPs) representing approximately 16 million people across  
110 Southern California. We investigated several lines of inquiry: First, what is the transcriptomic  
111 diversity of microorganisms in Southern California wastewater, and does it vary longitudinally?  
112 Second, what AMR genes are being actively transcribed in wastewater? Third, are there  
113 conserved biochemical pathways across wastewater, and does this metabolic potential vary?  
114 Lastly, are there largescale patterns of microbial transcription in Southern California's  
115 wastewater, and is there a temporal component to any of these patterns?

116 2. Materials and Methods:

117 *2.1 Sample collection*

118 We previously reported the sample collection and handling procedure in Rothman et al  
119 2021 (Rothman et al., 2021), and note that the viromes of 94 samples were previously reported in  
120 that study. Briefly, we collected 275 1-liter 24-hour composite influent wastewater samples by  
121 autosampler at eight WTPs across Southern California between August 2020 – August 2021  
122 (Table 1). We aliquoted and stored 50 mL of sample at 4 °C until RNA extraction.

123 *2.2 RNA extraction and sequencing library preparation*

124 We used a protocol based on Crits-Christoph 2021 (Crits-Christoph et al., 2021) and Wu  
125 et al 2020 (Wu et al., 2020), in which we pasteurized 50 mL of influent wastewater in a 65 °C  
126 water bath for 90 minutes, then filtered samples through a sterile 0.22- $\mu$ M filter (VWR, Radnor,  
127 PA). We then centrifuged the sample at 3,000 xg through 10-kDa Amicon filters  
128 (MilliporeSigma, Burlington, MA) and stored the concentrate at -80 °C until RNA extraction.  
129 We then used an Invitrogen PureLink RNA Mini Kit with added DNase step (Invitrogen,  
130 Waltham, MA) following the manufacturer's instructions to extract RNA and stored the resulting  
131 RNA at -80 °C until library preparation.

132 The University of California Irvine Genomics High Throughput Facility (GHTF) handled  
133 all library preparation steps. Briefly, the GHTF used the Illumina RNA Prep for Enrichment kit  
134 (Illumina, San Diego, CA) on each RNA sample, then sequenced the paired end libraries as 2 x  
135 100bp or 2 x 150 bp (supplemental file SF1) with an S4 300 cycle kit on an Illumina NovaSeq  
136 6000 over four batches.

137 *2.3 Bioinformatics and data processing*

138 We received the data from the GHTF as demultiplexed FASTQ files and used the UCI  
139 High Performance Community Computing Cluster for data processing. We used BBTools  
140 “bbduk” (Bushnell, 2014) to remove adapters, low-quality bases, and primers, then removed  
141 PCR duplicates with BBTools “dedupe.” After deduplication, we removed reads mapping to the  
142 human genome (hg38) with Bowtie2 (Langmead and Salzberg, 2012), then used Kraken2 (Wood  
143 et al., 2019) and Bracken (Lu et al., 2017) databases built with the NCBI RefSeq database of  
144 bacteria, archaea, and viruses (January 2021), to taxonomically classify reads. We then tabulated  
145 these reads and used these tables for downstream diversity analysis (supplemental file 2).

146 For community analyses, we normalized the transcript reads into within-sample relative  
147 abundances in R, removed reads corresponding to less than 0.01% relative abundance, then  
148 calculated Shannon Diversity indices and Bray-Curtis dissimilarity matrices with the R package  
149 “vegan” (Oksanen et al., 2017). We generated nonmetric multidimensional scaling (NMDS)  
150 ordinations, then tested the diversity metrics for significant differences with Kruskal-Wallis tests  
151 (alpha diversity) and Adonis PERMANOVA (beta diversity) with “vegan.” We assessed the  
152 relationship of diversity with time with linear mixed effects models (lmer) in the R package  
153 “lmerTest” using WTP and sequencing batch as random effects (Kuznetsova et al., 2017), and  
154 plotted all diversity analyses with “ggplot2” (Wickham, 2009), “ggrepel” (Slowikowski, 2018),  
155 and “patchwork” (Pedersen, 2020). Because we collected samples from Escondido, Hyperion,  
156 and Point Loma for a much longer period of time than the other WTPs, we ran the above  
157 analyses two ways: all WTPs together from August – November 2020, and Escondido, Hyperion,  
158 and Point Loma samples for the full year separately.

159 We used HUMAnN3 (Beghini et al., 2021) with default settings to assign functional gene  
160 pathway annotations to reads using the UniRef90 (Suzek et al., 2015) and Metacyc (Caspi et al.,



161 2020) databases. We also used RGI (the Resistance Gene Identifier) and the CARD and  
162 WildCARD databases (Alcock et al., 2020) to assign predicted antimicrobial resistance ontology  
163 identities (AROs) to the reads, then normalized all pathway abundances and AMR gene identities  
164 to transcripts per million (TPM). We compared microbial abundances, pathway abundances, and  
165 AMR gene abundances at greater than 0.01% relative abundance and present in 50% of samples  
166 between WTPs with ANCOM2.1 using sample collection month as an adjustment for covariates  
167 and sequencing batch as a random effect in the ANCOM models. We then plotted  $\log_{10}$   
168 transformed counts of significantly differentially abundant viruses, bacterial genera, and AMR  
169 genes on a heatmap allowing the taxa to cluster with the Ward D2 algorithm with the R package  
170 “pheatmap” (Kolde, 2019). We used MaAsLin2 (Mallick et al., 2021) for longitudinal analyses  
171 of the above-mentioned variables, and included WTP and sequencing batch as random effects in  
172 the models, and we adjusted ANCOM and MaAsLin2 statistical tests for multiple comparisons  
173 with the Benjamini-Hochberg correction. We report the linear model coefficient with time of  
174 MaAsLin2 analyses on each plot and refer to Zenodo ([doi.org/10.5281/zenodo.6829029](https://doi.org/10.5281/zenodo.6829029))  
175 (Rothman et al., 2022) for individual scatterplots.

#### 176 *2.4 Data and code availability*

177 Representative analyses scripts and code are available at  
178 [github.com/jasonarothman/wastewater\\_metatranscriptomics\\_social\\_aug20\\_aug21](https://github.com/jasonarothman/wastewater_metatranscriptomics_social_aug20_aug21) and raw  
179 sequencing files have been deposited at the NCBI Sequence Read Archive under accession  
180 numbers PRJNA729801. Data tables containing taxa abundances, HUMAnN3 pathway  
181 annotations, and RGI assigned predicted antimicrobial resistance ontology identities are  
182 available as a Dryad dataset (<https://doi.org/10.7280/D11Q30>) (Rothman et al., 2022)

183 3. Results:

184 *3.1 Library statistics and microbial sample composition*

185 We obtained a total of 4,336,566,730 quality-filtered, nonhuman, paired-end reads across  
186 275 samples from eight WTPs (average: 15,769,334 reads per sample, range: 1,039,430 –  
187 88,651,858). With Kraken2, we classified an average of 55.0% of our reads (range 8.7 – 83.5%),  
188 of which an average of 48.1% (range 7.0 – 83.0%) were bacterial, 0.2% were archaeal (range  
189 0.02 – 3.8%), and 5.9% (range 0.03 – 38.3%) were viral (Fig. 2). Due to the low relative  
190 abundance of archaea and known questionable classification accuracy, we chose to focus on  
191 bacteria and viruses for diversity analyses.

192 We detected transcripts from a total of 6,449 bacterial and 6,888 viral species across all  
193 samples, however due to the likelihood of the taxonomic classifier reporting spurious species, we  
194 removed species accounting for < 0.01% average relative abundance within each domain. This  
195 filtering left us with 935 bacterial and 134 viral species present, which we used for downstream  
196 analyses. We also tabulated 245 bacterial families present in the same fashion as above. Because  
197 we had an uneven longitudinal distribution of samples, we analyzed diversity, differential  
198 abundance, and longitudinal relationships in two ways: First, samples where we had all eight  
199 WTPs were analyzed together representing N = 98, covering the months of August – November  
200 2020. Second, we analyzed samples from Escondido, Hyperion, and Point Loma WTPs, where  
201 we had an entire year of sampling (N = 214), covering August 2020 – August 2021.

202 *3.2 Antimicrobial resistance transcription*

203 We detected transcripts matching 2,128 unique antibiotic resistance ontology identifiers  
204 (AROs) through use of RGI and the CARD database (Fig. 2, Dryad:  
205 <https://doi.org/10.7280/D11Q30>). AMR alpha diversity between August – November 2020

206 significantly differed between WTPs ( $H_{(7)} = 33.7$ ,  $P < 0.001$ ), but not over time ( $t = -0.3$ ,  $P =$   
207  $0.74$ ). AMR beta diversity during this time only differed between WTPs ( $P < 0.001$ ,  $R^2 = 0.43$ ),  
208 and not by month ( $P = 0.08$ ,  $R^2 = 0.03$ ), an interaction of WTP and month ( $P = 0.10$ ,  $R^2 = 0.16$ ),  
209 or sequencing batch ( $P = 0.05$ ,  $R^2 = 0.02$ ), and slightly changed over time ( $t = -2.3$ ,  $P = 0.03$ )  
210 (Fig. 3). Several AMR transcripts were differentially abundant between WTPs, and for easier  
211 discrimination between the categories, we separated them into ribosomal RNA mutations and  
212 non-rRNA AMR genes: 29 rRNA AMR mutants ( $W > 88$ ,  $P_{\text{adj}} < 0.05$ ) and 17 non-rRNA genes  
213 ( $W > 140$ ,  $P_{\text{adj}} < 0.05$ ) differed between WTPs (Fig. 3, supplemental file SF2).

214 When considering the entire year, AMR alpha diversity differed between WTPs ( $H_{(2)} =$   
215  $28.6$ ,  $P < 0.001$ ), but not over time ( $t = -0.6$ ,  $P = 0.68$ ). AMR beta diversity differed between  
216 WTPs ( $P < 0.001$ ,  $R^2 = 0.13$ ), month ( $P < 0.001$ ,  $R^2 = 0.16$ ), an interaction between WTP and  
217 month ( $P = 0.007$ ,  $R^2 = 0.12$ ), with significant batch effects ( $P < 0.001$ ,  $R^2 = 0.06$ ), and again,  
218 changed over time ( $t = 3.3$ ,  $P = 0.001$ ) (Fig. 3). We considered AMR transcripts from rRNA  
219 genes and non-ribosomal genes separately as above. For rRNA genes, we found that 26  
220 positively and 13 negatively correlated with time ( $P_{\text{adj}} < 0.05$ ), while 45 did not, and for non-  
221 ribosomal genes, 38 positively and 1 negatively changed over time ( $P_{\text{adj}} < 0.05$ ), while 256 did  
222 not change significantly (Fig. 3, supplemental file SF3, Zenodo:

223 [doi.org/10.5281/zenodo.6829029](https://doi.org/10.5281/zenodo.6829029)).

### 224 *3.3 Bacterial transcriptional ecology*

225 We found that the top ten most proportionally abundant bacterial families represented an  
226 average of 58.6% (range 17.7 – 82.3%) of bacterial transcripts. These families (in descending  
227 average proportional abundance) were: Campylobacteraceae, Pseudomonadaceae,

228 Enterobacteriaceae, Neisseriaceae, Moraxellaceae, Comamonadaceae, Burkholderiaceae,  
229 Aeromonadaceae, Weeksellaceae, and Methylobacteriaceae (Fig. 2).

230 From August – November 2020, bacterial transcript alpha diversity significantly differed  
231 between WTP ( $H_{(7)} = 55.5$ ,  $P < 0.001$ ), but not over time ( $t = -1.3$ ,  $P = 0.22$ ). Bacterial beta  
232 diversity was significantly different across WTPs ( $P < 0.001$ ,  $R^2 = 0.30$ ) and month ( $P < 0.001$ ,  
233  $R^2 = 0.09$ ), with no interaction between WTP and month ( $P = 0.13$ ,  $R^2 = 0.16$ ), was affected by  
234 sequencing batch ( $P < 0.001$ ,  $R^2 = 0.03$ ), and changed over time ( $t = -2.4$ ,  $P = 0.02$ ). We also  
235 found that transcripts from 222/564 bacterial genera were significantly differentially abundant  
236 between WTPs during this time period ( $W > 507$ ,  $P_{\text{adj}} < 0.05$ , Fig. 4, supplemental file SF2).

237 Across the entire year, alpha diversity was not different between WTPs ( $H_{(2)} = 1.1$ ,  $P =$   
238  $0.59$ ), and did not differ over time ( $t = 1.6$ ,  $P = 0.12$ ). Beta diversity differed between WTP ( $P <$   
239  $0.001$ ,  $R^2 = 0.07$ ), month ( $P < 0.001$ ,  $R^2 = 0.20$ ), and the interaction of WTP and month ( $P =$   
240  $0.002$ ,  $R^2 = 0.11$ ) with significant batch effects ( $P < 0.001$ ,  $R^2 = 0.06$ ), and over time as a  
241 continuous variable ( $t = 4.8$ ,  $P < 0.001$ ). We tracked the transcription of bacterial genera across  
242 the year, and found that 172 genera increased, 63 genera decreased, and 295 did not change  
243 significantly over time (Fig. 4, supplemental file SF3, Zenodo:  
244 [doi.org/10.5281/zenodo.6829029](https://doi.org/10.5281/zenodo.6829029)).

### 245 *3.4 Viral ecology*

246 We did not group viruses by family because of the dominance of *Virgaviridae*, and  
247 instead report summary statistics of the ten most proportionally abundant viral species as this  
248 provides more information. These viruses represented an average proportional viral abundance of  
249 92.4% (range 33.1 - 99.5%; in descending average proportional abundance): Tomato brown  
250 rugose fruit virus, Cucumber green mottle mosaic virus, Pepper mild mottle virus, crAssphage,

251 Tomato mosaic virus, Tropical soda apple mosaic virus, Tobacco mild green mosaic virus,  
252 Tomato mottle mosaic virus, Melon necrotic spot virus, and Pseudomonas virus PMBT3 (Fig. 2).  
253 Over August – November 2020, viral alpha diversity differed between WTPs ( $H_{(7)} = 35.1$ ,  
254  $P < 0.001$ ), but not over time ( $t = -0.57$ ,  $P = 0.58$ ). Beta diversity differed between WTPs ( $P <$   
255  $0.001$ ,  $R^2 = 0.31$ ), by month ( $P = 0.003$ ,  $R^2 = 0.07$ ), but not by an interaction between WTP and  
256 month ( $P = 0.69$ ,  $R^2 = 0.13$ ), by batch ( $P = 0.07$ ,  $R^2 = 0.02$ ), or over time ( $t = -1.6$ ,  $P = 0.11$ ).  
257 During this time period, only 11 viruses were differentially abundant between WTPs (Fig. 5,  
258 supplemental file SF2).

259 The full-year samples showed significantly different alpha diversity between WTP ( $H_{(2)} =$   
260  $55.4$ ,  $P < 0.001$ ) but not over time ( $t = 0.11$ ,  $P = 0.91$ ). Long-term beta diversity differed between  
261 WTPs ( $P = 0.005$ ,  $R^2 = 0.03$ ), month ( $P = 0.001$ ,  $R^2 = 0.11$ ), with no interaction between WTP  
262 and month ( $P = 0.34$ ,  $R^2 = 0.09$ ), with significant batch effects ( $P = 0.001$ ,  $R^2 = 0.11$ ), and  
263 changed significantly over time ( $t = 4.3$ ,  $P < 0.001$ ). When considering the proportional  
264 abundance of individual virus species over the year, 22 viruses increased 16 decreased, and 102  
265 did not change over time (Fig. 5, supplemental file SF3, [doi.org/10.5281/zenodo.6829029](https://doi.org/10.5281/zenodo.6829029)).

### 266 *3.5 Metabolic pathway transcription*

267 Across samples that successfully processed through HUMAnN3 ( $N = 252$ ), we detected  
268 transcripts that mapped to 474 Metacyc metabolic pathways (Dryad:  
269 <https://doi.org/10.7280/D11Q30>). Most commonly, we found transcriptional activity from  
270 pathways such as nucleotide biosynthesis, ubiquitination, amino acid biosynthesis, and central  
271 carbon metabolism, while we also detected rarer pathways involved in the degradation of  
272 xenobiotics including toluene, atrazine, nitrobenzoate, and octane.

273 Metabolic transcript alpha diversity was not significantly different across WTPs from  
274 August – November 2020 ( $H_{(7)} = 4.8$ ,  $P = 0.68$ ) and did not change over time ( $t = 1.2$ ,  $P = 0.222$ ).  
275 Likewise, metabolic transcript beta diversity during this period was not different between WTPs  
276 ( $P = 0.18$ ,  $R^2 = 0.09$ ), but slightly differed between months ( $P = 0.003$ ,  $R^2 = 0.07$ ) with an  
277 interaction between month and WTP ( $P = 0.03$ ,  $R^2 = 0.24$ ) (Fig. 6), with significant batch effects  
278 ( $P < 0.001$ ,  $R^2 = 0.06$ ), but did not change over time ( $t = 0.9$ ,  $P = 0.38$ ). There were no  
279 differentially-expressed metabolic pathways across WTPs during this time period.

280 Across the full year, transcript alpha diversity differed between WTPs ( $H_{(2)} = 14.4$ ,  $P <$   
281  $0.001$ ), but not over time ( $t = 1.3$ ,  $P = 0.19$ ). Beta diversity slightly differed between WTPs ( $P =$   
282  $0.008$ ,  $R^2 = 0.02$ ), month ( $P < 0.001$ ,  $R^2 = 0.17$ ), with an interaction between WTP and month ( $P$   
283  $= 0.005$ ,  $R^2 = 0.12$ ) with significant sequencing batch effects ( $P = 0.002$ ,  $R^2 = 0.04$ ), and did not  
284 change longitudinally ( $t = 0.8$ ,  $P = 0.41$ ). The transcription of few metabolic pathways had a  
285 significant association with time, as only 12 were positively, and one was negatively correlated,  
286 out of 205 pathways total (Fig. 6, supplemental file SF3, Zenodo:  
287 [doi.org/10.5281/zenodo.6829029](https://doi.org/10.5281/zenodo.6829029)).

288 4. Discussion:

289 Composite wastewater samples from Southern California over the year contained RNA  
290 transcripts derived from a wide diversity of microorganisms. To the best of our knowledge, our  
291 study representing a sewer shed of 16 million people is the most complete metatranscriptomic  
292 characterization of a large metropolitan region's wastewater to date. Most notably, we show  
293 evidence of actively transcribed antimicrobial resistance (AMR) genes that encode resistance to a  
294 variety of commonly-administered antimicrobial drugs including macrolides, aminoglycosides,  
295 tetracycline and other AMR classes (Alcock et al., 2020). Likewise, we also show that bacterial  
296 transcription and RNA viral diversity differed between wastewater treatment plants (WTPs), and  
297 that sequencing wastewater RNA can be a useful tool for wastewater-based epidemiology  
298 (WBE) (Brumfield et al., 2022; Crits-Christoph et al., 2021; de Nies et al., 2021; Rothman et al.,  
299 2021; Xagorarakis and O'Brien, 2020). Finally, we examined the total RNA pool and described  
300 metabolic pathway transcription to show that wastewater metabolism is largely consistent across  
301 WTPs and over time, but that there are slight signatures of geographical location (Gulino et al.,  
302 2020). Our results suggest that RNA sequencing is a viable tool to understand the complex  
303 matrix that wastewater represents and is useful in assaying the microbes associated with large  
304 populations.

305 *4.1 Antimicrobial resistance transcription across Southern California wastewater*

306 Wastewater is known to harbor an array of AMR genes, and several studies have  
307 sequenced and/or quantified many of these genes in wastewater (de Nies et al., 2021; Ju et al.,  
308 2019; Raza et al., 2022; Yin et al., 2021). Our study differs in that we demonstrate transcriptional  
309 activity through RNA-sequencing, rather than the genomic potential of the sampled organisms.  
310 We found a wide diversity of transcribed AMR genes in our data, including components of the

311 multidrug efflux pumps *adeFGH* (Coyne et al., 2010) and its repressor *acrS* (Hirakawa et al.,  
312 2008), the gene *tetQ* (Nikolich et al., 1992), which encodes a ribosomal protection protein  
313 against tetracycline, *Staphylococcus aureus*'s multidrug efflux protein *lmrS* (Floyd et al., 2010),  
314 genes in the aminoglycoside resistance series *aadA* and *aph(3'')* (Ramirez and Tolmasky, 2010),  
315 and several variants of the glycopeptide resistance gene *vanR* (Courvalin, 2006). Many of these  
316 transcripts have been previously detected in WTPs, or in animals that resided in wastewater  
317 (Brumfield et al., 2022; Marcelino et al., 2019). Because we did not deplete rRNAs during  
318 library preparations, most of our bacterial transcripts were ribosomal RNAs. We detected rRNA  
319 mutations that confer macrolide resistance in the medically important taxa *Neisseria*,  
320 *Campylobacter*, *Salmonella*, *Helicobacter*, *Staphylococcus*, *Streptococcus*, *Klebsiella*, and many  
321 others. These genera (and subsequent AMR-resistant rRNAs) were ubiquitous in our samples  
322 and are often found in wastewater (Jankowski et al., 2022; Joseph et al., 2019; Ju et al., 2019).  
323 Our results indicate transcriptional evidence of widespread AMR activity, and we posit that this  
324 AMR presence is likely to be found in other wastewater catchments making metatranscriptomics  
325 useful for tracking AMR across wide areas (de Nies et al., 2021). The diversity of AMR genes in  
326 our samples differed between WTPs, and there were a few AMR genes differentially abundant  
327 between WTPs – mostly mutant rRNAs. This finding supports studies that show geographic  
328 differences between AMR (Raza et al., 2022; Yin et al., 2021), but there are likely other factors  
329 impacting the diversity of AMR, such as disease load in the served populations. Interestingly, we  
330 noticed a general increase over time in the proportional abundance of several transcripts from the  
331 major facilitator superfamily (MFS) and resistance-nodulation-cell division (RND) antibiotic  
332 efflux pumps - which are often implicated in multidrug resistance (Li and Nikaido, 2009) - along  
333 with beta-lactamases, and aminoglycoside/macrolide resistant rRNAs (Alcock et al., 2020).



334 These data support studies showing an increase in antibiotic resistance (Ju et al., 2019) and the  
335 prevalence of AMR genes, but may also be impacted by seasonal changes in the waste stream  
336 (Yang et al., 2013). Likewise, as antibiotic use has risen during the COVID-19 pandemic  
337 (Langford et al., 2020; Rose et al., 2021), we may be observing a concurrent rise in AMR  
338 transcription in wastewater, although because our samples were solely collected during COVID-  
339 19, we are only able to speculate.

#### 340 *4.2 Viral ecology of Southern California wastewater*

341 Plant-infecting tobamoviruses dominated the viromes of our samples regardless of source  
342 or time of year (Bačnik et al., 2020; Brumfield et al., 2022; Cantalupo et al., 2011; Crits-  
343 Christoph et al., 2021), although we also found substantial numbers of reads mapping to phages  
344 including crAssphage and assorted bacteriophages. While most known phages have DNA  
345 genomes, previous studies have identified phages in wastewater RNA (Crits-Christoph et al.,  
346 2021; Wilder et al., 2021). We may be detecting novel RNA viruses, or transcription of either  
347 DNA or RNA based phage genomes. Viral diversity differed when tested across all WTPs and  
348 over the full year, supporting studies that suggest geographical signatures of viruses in  
349 wastewater, and may be due to differences in human diet and viral excretion, along with disease  
350 dynamics in bacteria and/or eukaryotic hosts (Bibby and Peccia, 2013; Brumfield et al., 2022;  
351 Gulino et al., 2020). Likewise, several viruses were differentially abundant over time, which may  
352 be due to underlying infection trends or due to unknown seasonality effects (Brinkman et al.,  
353 2017; Kazama et al., 2016). While overall viral diversity was different between WTPs and  
354 changed over time, highly abundant viruses tended to be present in most samples, which may  
355 afford new targets in establishing microbial water quality or the detection of sewage pollution  
356 (Cao et al., 2015; Jiang et al., 2022; Kitajima et al., 2018). Similarly, we detected several human-

357 infecting viruses (i.e. Norwalk Virus and SARS-CoV-2) which provides support for WBE efforts  
358 (Crits-Christoph et al., 2021; Nemudryi et al., 2020; Rothman et al., 2021, 2020; Xagorarakis and  
359 O'Brien, 2020), and we suggest that RNA sequencing of wastewater should be used in  
360 conjunction with targeted and quantificational approaches to assist in passively monitoring  
361 diseases across large populations.

#### 362 *4.3 Bacterial ecology and metabolic pathways in Southern California wastewater*

363         Similar to other studies, we detected transcripts from bacterial species in wastewater -  
364 mostly in the form of rRNA reads (de Nies et al., 2021; Joseph et al., 2019). Human pathogens  
365 were broadly represented in our data, including ESKAPE bacteria (*Enterococcus faecium*,  
366 *Staphylococcus aureus*, *Klebsiella pneumoniae*, *Acinetobacter baumannii*, *Pseudomonas*  
367 *aeruginosa*, and *Enterobacter* spp.), *Campylobacter jejuni*, *Salmonella* spp., *Helicobacter pylori*,  
368 *Haemophilus* spp., sexually transmitted infectious (STIs) agents, and bacteria commonly found  
369 in the environment. Much as with viruses, the bacterial profiles of WTPs were different,  
370 although many species were ubiquitous throughout the samples (Wu et al., 2019). There were  
371 also noticeable changes in the relative proportional transcript abundance over time, with many  
372 bacterial genera displaying a bimodal periodicity: Higher transcript abundance during Winter  
373 and Summer, and generally higher as time proceeded from August 2020 to August 2021. Other  
374 work has shown a distinct seasonality to the wastewater microbial community (Peces et al.,  
375 2022) - and our data supports this as well - although there are many other factors that can affect  
376 wastewater communities, such as pH, flux, dissolved oxygen, and detergents (Wu et al., 2019).  
377 Likewise, we recognize that our RNA extraction methods were harsh, and surely resulted in  
378 nucleic acid degradation, which likely affects the accuracy of our results (Schuierer et al., 2017).  
379 Non-ribosomal bacterial metabolism was apparent in our data with transcripts mapping to

380 widely-conserved pathways such as nucleotide and amino acid biosynthesis and ubiquitination,  
381 with no pathways differing between WTPs or over time (Caspi et al., 2020). Collectively, our  
382 results suggest that sequencing bacterial species and their constituent metabolic pathways  
383 common to wastewater may be useful for monitoring disease through WBE, and that novel  
384 targets to assay microbial water quality may be possible.

385 5. Conclusion:

386 In our opinion, this large-scale longitudinal dataset represents an unprecedented  
387 metatranscriptomic characterization of wastewater across a large population and region. We  
388 detected a wide diversity of transcribed AMR genes, suggesting that RNA sequencing is a  
389 powerful tool for WBE and may be useful in monitoring the spread and intensity of AMR.  
390 Within our study, we sequenced the viromes of a large portion of Southern California's  
391 wastewater catchment area and show that plant-infecting viruses dominate the RNA viral  
392 fraction, which may have additional uses in detecting agricultural disease outbreaks. Similarly,  
393 we detected numerous human pathogens and observed changes in the relative proportions of  
394 these taxa, lending more credence to WBE as a vital component to public health and microbial  
395 water quality assays. We suggest that future transcriptomic studies target disease-causing taxa in  
396 wastewater to understand and refine WBE and its usefulness to human health more deeply.

397

398 Acknowledgments:

399 We thank the staff of the City of Escondido Hale Avenue Resource Recovery Facility,  
400 the City of Los Angeles Sanitation and Environment, Los Angeles County Sanitation District,  
401 Orange County Sanitation District, and City of San Diego Public Utilities for collecting influent.

402 This research was supported by the University of California Office of the President  
403 Research Grants Program Office (award numbers R01RG3732 and R00RG2814) awarded to  
404 JAR and KLW, and a Hewitt Foundation for Biomedical Research postdoctoral fellowship to  
405 JAR. This work was made possible, in part, through access to the Genomics High Throughput  
406 Facility Shared Resource of the Cancer Center Support Grant (P30CA-062203) at the University  
407 of California, Irvine, NIH shared instrumentation grants 1S10RR025496-01, 1S10OD010794-01,

408 and 1S10OD021718-01, and access to computing resources from the UCI High Performance  
409 Cloud Computing Center.

410 References:

- 411
- 412 Achak, M., Alaoui Bakri, S., Chhiti, Y., M'hamdi Alaoui, F.E., Barka, N., Boumya, W., 2021.
- 413 SARS-CoV-2 in hospital wastewater during outbreak of COVID-19: A review on
- 414 detection, survival and disinfection technologies. *Sci. Total Environ.* 761, 143192.
- 415 <https://doi.org/10.1016/j.scitotenv.2020.143192>
- 416 Alcock, B.P., Raphenya, A.R., Lau, T.T.Y., Tsang, K.K., Bouchard, M., Edalatmand, A., Huynh,
- 417 W., Nguyen, A.-L.V., Cheng, A.A., Liu, S., Min, S.Y., Miroshnichenko, A., Tran, H.-K.,
- 418 Werfalli, R.E., Nasir, J.A., Oloni, M., Speicher, D.J., Florescu, A., Singh, B., Faltyn, M.,
- 419 Hernandez-Koutoucheva, A., Sharma, A.N., Bordeleau, E., Pawlowski, A.C., Zubyk,
- 420 H.L., Dooley, D., Griffiths, E., Maguire, F., Winsor, G.L., Beiko, R.G., Brinkman,
- 421 F.S.L., Hsiao, W.W.L., Domselaar, G.V., McArthur, A.G., 2020. CARD 2020: antibiotic
- 422 resistome surveillance with the comprehensive antibiotic resistance database. *Nucleic*
- 423 *Acids Res.* 48, D517–D525. <https://doi.org/10.1093/nar/gkz935>
- 424 Amoah, I.D., Kumari, S., Bux, F., 2020. Coronaviruses in wastewater processes: Source, fate and
- 425 potential risks. *Environ. Int.* 143, 105962. <https://doi.org/10.1016/j.envint.2020.105962>
- 426 Bačnik, K., Kutnjak, D., Pecman, A., Mehle, N., Tušek Žnidarič, M., Gutiérrez Aguirre, I.,
- 427 Ravnikar, M., 2020. Viromics and infectivity analysis reveal the release of infective plant
- 428 viruses from wastewater into the environment. *Water Res.* 177, 115628.
- 429 <https://doi.org/10.1016/j.watres.2020.115628>
- 430 Beghini, F., McIver, L.J., Blanco-Míguez, A., Dubois, L., Asnicar, F., Maharjan, S., Mailyan, A.,
- 431 Manghi, P., Scholz, M., Thomas, A.M., Valles-Colomer, M., Weingart, G., Zhang, Y.,
- 432 Zolfo, M., Huttenhower, C., Franzosa, E.A., Segata, N., 2021. Integrating taxonomic,
- 433 functional, and strain-level profiling of diverse microbial communities with bioBakery 3.
- 434 *Elife* 10. <https://doi.org/10.7554/eLife.65088>
- 435 Bibby, K., Peccia, J., 2013. Identification of viral pathogen diversity in sewage sludge by
- 436 metagenome analysis. *Environ. Sci. Technol.* 47, 1945–1951.
- 437 <https://doi.org/10.1021/es305181x>
- 438 Bivins, A., North, D., Ahmad, A., Ahmed, W., Alm, E., Been, F., Bhattacharya, P., Bijlsma, L.,
- 439 Boehm, A.B., Brown, J., Buttiglieri, G., Calabro, V., Carducci, A., Castiglioni, S.,
- 440 Cetecioglu Gurol, Z., Chakraborty, S., Costa, F., Curcio, S., De Los Reyes, F.L., Delgado
- 441 Vela, J., Farkas, K., Fernandez-Casi, X., Gerba, C., Gerrity, D., Girones, R., Gonzalez,
- 442 R., Haramoto, E., Harris, A., Holden, P.A., Islam, M.T., Jones, D.L., Kasprzyk-Hordern,
- 443 B., Kitajima, M., Kotlarz, N., Kumar, M., Kuroda, K., La Rosa, G., Malpei, F., Mautus,
- 444 M., McLellan, S.L., Medema, G., Meschke, J.S., Mueller, J., Newton, R.J., Nilsson, D.,
- 445 Noble, R.T., Van Nuijs, A., Peccia, J., Perkins, T.A., Pickering, A.J., Rose, J., Sanchez,
- 446 G., Smith, A., Stadler, L., Stauber, C., Thomas, K., Van Der Voorn, T., Wigginton, K.,
- 447 Zhu, K., Bibby, K., 2020. Wastewater-based epidemiology: global collaborative to
- 448 maximize contributions in the fight against COVID-19. *Environmental Science and*
- 449 *Technology.* <https://doi.org/10.1021/acs.est.0c02388>
- 450 Brinkman, N.E., Fout, G.S., Keely, S.P., 2017. Retrospective surveillance of wastewater to
- 451 examine seasonal dynamics of *Enterovirus* infections. *mSphere* 2.
- 452 <https://doi.org/10.1128/mSphere.00099-17>
- 453 Brumfield, K.D., Leddy, M., Usmani, M., Cotruvo, J.A., Tien, C.-T., Dorsey, S., Graubics, K.,
- 454 Fanelli, B., Zhou, I., Registe, N., Dadlani, M., Wimalarante, M., Jinasena, D.,
- 455 Abayagunawardena, R., Withanachchi, C., Huq, A., Jutla, A., Colwell, R.R., 2022.

- 456 Microbiome analysis for wastewater surveillance during COVID-19. MBio e0059122.  
457 <https://doi.org/10.1128/mbio.00591-22>
- 458 Bushnell, B., 2014. BBTools software package.
- 459 Cantalupo, P.G., Calgua, B., Zhao, G., Hundesa, A., Wier, A.D., Katz, J.P., Grabe, M., Hendrix,  
460 R.W., Girones, R., Wang, D., Pipas, J.M., 2011. Raw sewage harbors diverse viral  
461 populations. MBio 2. <https://doi.org/10.1128/mBio.00180-11>
- 462 Cao, Y., Raith, M.R., Griffith, J.F., 2015. Droplet digital PCR for simultaneous quantification of  
463 general and human-associated fecal indicators for water quality assessment. Water Res.  
464 70, 337–349. <https://doi.org/10.1016/j.watres.2014.12.008>
- 465 Caspi, R., Billington, R., Keseler, I.M., Kothari, A., Krummenacker, M., Midford, P.E., Ong,  
466 W.K., Paley, S., Subhraveti, P., Karp, P.D., 2020. The MetaCyc database of metabolic  
467 pathways and enzymes - a 2019 update. Nucleic Acids Res. 48, D445–D453.  
468 <https://doi.org/10.1093/nar/gkz862>
- 469 Courvalin, P., 2006. Vancomycin resistance in gram-positive cocci. Clin. Infect. Dis. 42 Suppl 1,  
470 S25-34. <https://doi.org/10.1086/491711>
- 471 Coyne, S., Rosenfeld, N., Lambert, T., Courvalin, P., Périchon, B., 2010. Overexpression of  
472 resistance-nodulation-cell division pump AdeFGH confers multidrug resistance in  
473 *Acinetobacter baumannii*. Antimicrob. Agents Chemother. 54, 4389–4393.  
474 <https://doi.org/10.1128/AAC.00155-10>
- 475 Crits-Christoph, A., Kantor, R.S., Olm, M.R., Whitney, O.N., Al-Shayeb, B., Lou, Y.C.,  
476 Flamholz, A., Kennedy, L.C., Greenwald, H., Hinkle, A., Hetzel, J., Spitzer, S., Koble, J.,  
477 Tan, A., Hyde, F., Schroth, G., Kuersten, S., Banfield, J.F., Nelson, K.L., 2021. Genome  
478 Sequencing of sewage detects regionally prevalent SARS-CoV-2 variants. MBio 12.  
479 <https://doi.org/10.1128/mBio.02703-20>
- 480 de Nies, L., Busi, S.B., Kunath, B.J., May, P., Wilmes, P., 2021. Mobilome-driven segregation of  
481 the resistome in biological wastewater treatment. bioRxiv.  
482 <https://doi.org/10.1101/2021.11.15.468621>
- 483 Edwards, R.A., Vega, A.A., Norman, H.M., Ohaeri, M., Levi, K., Dinsdale, E.A., Cinek, O.,  
484 Aziz, R.K., McNair, K., Barr, J.J., Bibby, K., Brouns, S.J.J., Cazares, A., de Jonge, P.A.,  
485 Desnues, C., Díaz Muñoz, S.L., Fineran, P.C., Kurilshikov, A., Lavigne, R., Mazankova,  
486 K., McCarthy, D.T., Nobrega, F.L., Reyes Muñoz, A., Tapia, G., Trefault, N., Tyakht,  
487 A.V., Vinuesa, P., Wagemans, J., Zhernakova, A., Aarestrup, F.M., Ahmadov, G.,  
488 Alassaf, A., Anton, J., Asangba, A., Billings, E.K., Cantu, V.A., Carlton, J.M., Cazares,  
489 D., Cho, G.-S., Condeff, T., Cortés, P., Cranfield, M., Cuevas, D.A., De la Iglesia, R.,  
490 Decewicz, P., Doane, M.P., Dominy, N.J., Dziejewit, L., Elwasila, B.M., Eren, A.M.,  
491 Franz, C., Fu, J., Garcia-Aljaro, C., Ghedin, E., Gulino, K.M., Haggerty, J.M., Head,  
492 S.R., Hendriksen, R.S., Hill, C., Hyöty, H., Ilina, E.N., Irwin, M.T., Jeffries, T.C., Jofre,  
493 J., Junge, R.E., Kelley, S.T., Khan Mirzaei, M., Kowalewski, M., Kumaresan, D., Leigh,  
494 S.R., Lipson, D., Lisitsyna, E.S., Llagostera, M., Maritz, J.M., Marr, L.C., McCann, A.,  
495 Molshanski-Mor, S., Monteiro, S., Moreira-Grez, B., Morris, M., Mugisha, L., Muniesa,  
496 M., Neve, H., Nguyen, N.-P., Nigro, O.D., Nilsson, A.S., O'Connell, T., Odeh, R.,  
497 Oliver, A., Piuri, M., Prussin, A.J., Ii, Qimron, U., Quan, Z.-X., Rainetova, P., Ramírez-  
498 Rojas, A., Raya, R., Reasor, K., Rice, G.A.O., Rossi, A., Santos, R., Shimashita, J.,  
499 Stachler, E.N., Stene, L.C., Strain, R., Stumpf, R., Torres, P.J., Twaddle, A., Ugochi  
500 Ibekwe, M., Villagra, N., Wandro, S., White, B., Whiteley, A., Whiteson, K.L.,  
501 Wijmenga, C., Zambrano, M.M., Zschach, H., Dutilh, B.E., 2019. Global

- 502 phylogeography and ancient evolution of the widespread human gut virus crAssphage.  
503 Nat Microbiol 4, 1727–1736. <https://doi.org/10.1038/s41564-019-0494-6>
- 504 Farkas, K., Adriaenssens, E.M., Walker, D.I., McDonald, J.E., Malham, S.K., Jones, D.L., 2019.  
505 Critical evaluation of crAssphage as a molecular marker for human-derived wastewater  
506 contamination in the aquatic environment. Food Environ. Virol. 11, 113–119.  
507 <https://doi.org/10.1007/s12560-019-09369-1>
- 508 Faust, K., Lahti, L., Gonze, D., de Vos, W.M., Raes, J., 2015. Metagenomics meets time series  
509 analysis: unraveling microbial community dynamics. Curr. Opin. Microbiol. 25, 56–66.  
510 <https://doi.org/10.1016/j.mib.2015.04.004>
- 511 Floyd, J.L., Smith, K.P., Kumar, S.H., Floyd, J.T., Varela, M.F., 2010. LmrS is a multidrug  
512 efflux pump of the major facilitator superfamily from *Staphylococcus aureus*.  
513 Antimicrob. Agents Chemother. 54, 5406–5412. <https://doi.org/10.1128/AAC.00580-10>
- 514 Gulino, K., Rahman, J., Badri, M., Morton, J., Bonneau, R., Ghedin, E., 2020. Initial mapping of  
515 the New York City wastewater virome. mSystems 5.  
516 <https://doi.org/10.1128/mSystems.00876-19>
- 517 Hellmér, M., Paxéus, N., Magnus, L., Enache, L., Arnholm, B., Johansson, A., Bergström, T.,  
518 Norder, H., 2014. Detection of pathogenic viruses in sewage provided early warnings of  
519 hepatitis A virus and norovirus outbreaks. Appl. Environ. Microbiol. 80, 6771–6781.  
520 <https://doi.org/10.1128/AEM.01981-14>
- 521 Hirakawa, H., Takumi-Kobayashi, A., Theisen, U., Hirata, T., Nishino, K., Yamaguchi, A.,  
522 2008. AcrS/EnvR represses expression of the acrAB multidrug efflux genes in  
523 *Escherichia coli*. J. Bacteriol. 190, 6276–6279. <https://doi.org/10.1128/JB.00190-08>
- 524 Hubeny, J., Korzeniewska, E., Buta-Hubeny, M., Zieliński, W., Rolbiecki, D., Harnisz, M.,  
525 2022. Characterization of carbapenem resistance in environmental samples and  
526 *Acinetobacter* spp. isolates from wastewater and river water in Poland. Sci. Total  
527 Environ. 822, 153437. <https://doi.org/10.1016/j.scitotenv.2022.153437>
- 528 Jankowski, P., Gan, J., Le, T., McKennitt, M., Garcia, A., Yanaç, K., Yuan, Q., Uyaguari-Diaz,  
529 M., 2022. Metagenomic community composition and resistome analysis in a full-scale  
530 cold climate wastewater treatment plant. Environ Microbiome 17, 3.  
531 <https://doi.org/10.1186/s40793-022-00398-1>
- 532 Jiang, S.C., Bischel, H.N., Goel, R., Rosso, D., Sherchan, S.P., Whiteson, K.L., Yan, T., Solo-  
533 Gabriele, H.M., 2022. Integrating virus monitoring strategies for safe non-potable water  
534 reuse. Water 14, 1187. <https://doi.org/10.3390/w14081187>
- 535 Joseph, S.M., Battaglia, T., Maritz, J.M., Carlton, J.M., Blaser, M.J., 2019. Longitudinal  
536 comparison of bacterial diversity and antibiotic resistance genes in New York City  
537 sewage. mSystems 4. <https://doi.org/10.1128/mSystems.00327-19>
- 538 Ju, F., Beck, K., Yin, X., Maccagnan, A., McArdeell, C.S., Singer, H.P., Johnson, D.R., Zhang,  
539 T., Bürgmann, H., 2019. Wastewater treatment plant resistomes are shaped by bacterial  
540 composition, genetic exchange, and upregulated expression in the effluent microbiomes.  
541 ISME J. 13, 346–360. <https://doi.org/10.1038/s41396-018-0277-8>
- 542 Karkman, A., Do, T.T., Walsh, F., Virta, M.P.J., 2018. Antibiotic-resistance genes in waste  
543 water. Trends Microbiol. 26, 220–228. <https://doi.org/10.1016/j.tim.2017.09.005>
- 544 Karthikeyan, S., Ronquillo, N., Belda-Ferre, P., Alvarado, D., Javidi, T., Longhurst, C.A.,  
545 Knight, R., 2021. High-throughput wastewater SARS-CoV-2 detection enables  
546 forecasting of community infection dynamics in San Diego County. mSystems 6.  
547 <https://doi.org/10.1128/mSystems.00045-21>



- 548 Kazama, S., Masago, Y., Tohma, K., Souma, N., Imagawa, T., Suzuki, A., Liu, X., Saito, M.,  
549 Oshitani, H., Omura, T., 2016. Temporal dynamics of norovirus determined through  
550 monitoring of municipal wastewater by pyrosequencing and virological surveillance of  
551 gastroenteritis cases. *Water Res.* 92, 244–253.  
552 <https://doi.org/10.1016/j.watres.2015.10.024>
- 553 Kitajima, M., Sassi, H.P., Torrey, J.R., 2018. Pepper mild mottle virus as a water quality  
554 indicator. *npj Clean Water* 1, 19. <https://doi.org/10.1038/s41545-018-0019-5>
- 555 Kolde, R., 2019. pheatmap: Pretty Heatmaps.
- 556 Kuznetsova, A., Brockhoff, P.B., Christensen, R.H.B., 2017. {lmerTest} Package: Tests in  
557 Linear Mixed Effects Models. *J. Stat. Softw.* 82, 1–26.  
558 <https://doi.org/10.18637/jss.v082.i13>
- 559 Langford, B.J., So, M., Raybardhan, S., Leung, V., Westwood, D., MacFadden, D.R., Soucy, J.-  
560 P.R., Daneman, N., 2020. Bacterial co-infection and secondary infection in patients with  
561 COVID-19: a living rapid review and meta-analysis. *Clin. Microbiol. Infect.* 26, 1622–  
562 1629. <https://doi.org/10.1016/j.cmi.2020.07.016>
- 563 Langmead, B., Salzberg, S.L., 2012. Fast gapped-read alignment with Bowtie 2. *Nat. Methods* 9,  
564 357–359. <https://doi.org/10.1038/nmeth.1923>
- 565 Li, R., Zhu, L., Cui, L., Zhu, Y.-G., 2022. Viral diversity and potential environmental risk in  
566 microplastic at watershed scale: Evidence from metagenomic analysis of plastisphere.  
567 *Environ. Int.* 161, 107146. <https://doi.org/10.1016/j.envint.2022.107146>
- 568 Li, X.-Z., Nikaido, H., 2009. Efflux-mediated drug resistance in bacteria: an update. *Drugs* 69,  
569 1555–1623. <https://doi.org/10.2165/11317030-000000000-00000>
- 570 Lu, J., Breitwieser, F.P., Thielen, P., Salzberg, S.L., 2017. Bracken: Estimating species  
571 abundance in metagenomics data. *PeerJ Computer Science* 2017, e104.  
572 <https://doi.org/10.7717/peerj-cs.104>
- 573 Lu, L., Guest, J.S., Peters, C.A., Zhu, X., Rau, G.H., Ren, Z.J., 2018. Wastewater treatment for  
574 carbon capture and utilization. *Nature Sustainability* 1, 750–758.  
575 <https://doi.org/10.1038/s41893-018-0187-9>
- 576 Mallick, H., Rahnavard, A., McIver, L.J., Ma, S., Zhang, Y., Nguyen, L.H., Tickle, T.L.,  
577 Weingart, G., Ren, B., Schwager, E.H., Chatterjee, S., Thompson, K.N., Wilkinson, J.E.,  
578 Subramanian, A., Lu, Y., Waldron, L., Paulson, J.N., Franzosa, E.A., Bravo, H.C.,  
579 Huttenhower, C., 2021. Multivariable association discovery in population-scale meta-  
580 omics studies. *PLoS Comput. Biol.* 17, e1009442.  
581 <https://doi.org/10.1371/journal.pcbi.1009442>
- 582 Manor, Y., Handsher, R., Halmut, T., Neuman, M., Bobrov, A., Rudich, H., Vonsover, A.,  
583 Shulman, L., Kew, O., Mendelson, E., 1999. Detection of poliovirus circulation by  
584 environmental surveillance in the absence of clinical cases in Israel and the Palestinian  
585 Authority. *J. Clin. Microbiol.* 37, 1670–1675. [https://doi.org/10.1128/jcm.37.6.1670-](https://doi.org/10.1128/jcm.37.6.1670-1675.1999)  
586 [1675.1999](https://doi.org/10.1128/jcm.37.6.1670-1675.1999)
- 587 Marcelino, V.R., Wille, M., Hurt, A.C., González-Acuña, D., Klaassen, M., Schlub, T.E., Eden,  
588 J.-S., Shi, M., Iredell, J.R., Sorrell, T.C., Holmes, E.C., 2019. Meta-transcriptomics  
589 reveals a diverse antibiotic resistance gene pool in avian microbiomes. *BMC Biol.* 17, 31.  
590 <https://doi.org/10.1186/s12915-019-0649-1>
- 591 Martínez-Puchol, S., Rusiñol, M., Fernández-Cassi, X., Timoneda, N., Itarte, M., Andrés, C.,  
592 Antón, A., Abril, J.F., Girones, R., Bofill-Mas, S., 2020. Characterisation of the sewage

- 593 virome: comparison of NGS tools and occurrence of significant pathogens. *Sci. Total*  
594 *Environ.* 713, 136604. <https://doi.org/10.1016/j.scitotenv.2020.136604>
- 595 McLellan, S.L., Huse, S.M., Mueller-Spitz, S.R., Andreishcheva, E.N., Sogin, M.L., 2010.  
596 Diversity and population structure of sewage-derived microorganisms in wastewater  
597 treatment plant influent. *Environ. Microbiol.* 12, 378–392. [https://doi.org/10.1111/j.1462-](https://doi.org/10.1111/j.1462-2920.2009.02075.x)  
598 [2920.2009.02075.x](https://doi.org/10.1111/j.1462-2920.2009.02075.x)
- 599 Nemudryi, A., Nemudraia, A., Wiegand, T., Surya, K., Buyukyoruk, M., Cicha, C.,  
600 Vanderwood, K.K., Wilkinson, R., Wiedenheft, B., 2020. Temporal detection and  
601 phylogenetic assessment of SARS-CoV-2 in municipal wastewater. *Cell Rep Med* 1,  
602 100098. <https://doi.org/10.1016/j.xcrm.2020.100098>
- 603 Newton, R.J., McClary, J.S., 2019. The flux and impact of wastewater infrastructure  
604 microorganisms on human and ecosystem health. *Curr. Opin. Biotechnol.* 57, 145–150.  
605 <https://doi.org/10.1016/j.copbio.2019.03.015>
- 606 Nikolich, M.P., Shoemaker, N.B., Salyers, A.A., 1992. A *Bacteroides* tetracycline resistance  
607 gene represents a new class of ribosome protection tetracycline resistance. *Antimicrob.*  
608 *Agents Chemother.* 36, 1005–1012. <https://doi.org/10.1128/AAC.36.5.1005>
- 609 Oksanen, J., Blanchet, F.G., Friendly, M., Kindt, R., Legendre, P., McGlinn, D., Minchin, P.R.,  
610 O'Hara, R.B., Simpson, G.L., Solymos, P., Stevens, M.H.H., Szoecs, E., Wagner, H.,  
611 2017. *vegan: Community Ecology Package*.
- 612 Peccia, J., Zulli, A., Brackney, D.E., Grubaugh, N.D., Kaplan, E.H., Casanovas-Massana, A.,  
613 Ko, A.I., Malik, A.A., Wang, D., Wang, M., Warren, J.L., Weinberger, D.M., Arnold,  
614 W., Omer, S.B., 2020. Measurement of SARS-CoV-2 RNA in wastewater tracks  
615 community infection dynamics. *Nat. Biotechnol.* 38, 1164–1167.  
616 <https://doi.org/10.1038/s41587-020-0684-z>
- 617 Peces, M., Dottorini, G., Nierychlo, M., Andersen, K.S., Dueholm, M.K.D., Nielsen, P.H., 2022.  
618 Microbial communities across activated sludge plants show recurring species-level  
619 seasonal patterns. *ISME Communications* 2, 1–11. [https://doi.org/10.1038/s43705-022-](https://doi.org/10.1038/s43705-022-00098-4)  
620 [00098-4](https://doi.org/10.1038/s43705-022-00098-4)
- 621 Pedersen, T.L., 2020. *Patchwork: The composer of plots*. R package version 1, 182.
- 622 Ramirez, M.S., Tolmasky, M.E., 2010. Aminoglycoside modifying enzymes. *Drug Resist.*  
623 *Updat.* 13, 151–171. <https://doi.org/10.1016/j.drug.2010.08.003>
- 624 Raza, S., Shin, H., Hur, H.-G., Unno, T., 2022. Higher abundance of core antimicrobial resistant  
625 genes in effluent from wastewater treatment plants. *Water Res.* 208, 117882.  
626 <https://doi.org/10.1016/j.watres.2021.117882>
- 627 Rose, A.N., Baggs, J., Wolford, H., Neuhauser, M.M., Srinivasan, A., Gundlapalli, A.V., Reddy,  
628 S., Kompaniyets, L., Pennington, A.F., Grigg, C., Kabbani, S., 2021. Trends in antibiotic  
629 use in United States hospitals during the Coronavirus Disease 2019 Pandemic. *Open*  
630 *Forum Infect Dis* 8, ofab236. <https://doi.org/10.1093/ofid/ofab236>
- 631 Rothman, J., Sagir, A., Chung, S.-A., Boyajian, N., Dinh, T., Kim, J., Oval, J., Sharavanan, V.,  
632 York, C., Zimmer-Faust, A., Langlois, K., Steele, J., Griffith, J., Whiteson, K., 2022.  
633 Data for: Longitudinal metatranscriptomic sequencing of Southern California wastewater  
634 representing 16 million people from August 2020-21 reveals widespread transcription of  
635 antibiotic resistance genes. <https://doi.org/10.7280/D11Q30>
- 636 Rothman, J.A., Loveless, T.B., Griffith, M.L., Steele, J.A., Griffith, J.F., Whiteson, K.L., 2020.  
637 *Metagenomics of wastewater influent from Southern California wastewater treatment*

- 638 facilities in the era of COVID-19. *Microbiology Resource Announcements* 9, 19–21.  
639 <https://doi.org/10.1128/mra.00907-20>
- 640 Rothman, J.A., Loveless, T.B., Kaptcia, J., 3rd, Adams, E.D., Steele, J.A., Zimmer-Faust, A.G.,  
641 Langlois, K., Wanless, D., Griffith, M., Mao, L., Chokry, J., Griffith, J.F., Whiteson,  
642 K.L., 2021. RNA viromics of Southern California wastewater and detection of SARS-  
643 CoV-2 single-nucleotide variants. *Appl. Environ. Microbiol.* 87, e0144821.  
644 <https://doi.org/10.1128/AEM.01448-21>
- 645 Schuierer, S., Carbone, W., Knehr, J., Petitjean, V., Fernandez, A., Sultan, M., Roma, G., 2017.  
646 A comprehensive assessment of RNA-seq protocols for degraded and low-quantity  
647 samples. *BMC Genomics* 18, 442. <https://doi.org/10.1186/s12864-017-3827-y>
- 648 Sims, N., Kasprzyk-Hordern, B., 2020. Future perspectives of wastewater-based epidemiology:  
649 Monitoring infectious disease spread and resistance to the community level. *Environ. Int.*  
650 139, 105689. <https://doi.org/10.1016/j.envint.2020.105689>
- 651 Slowikowski, K., 2018. ggrepel: Automatically position non-overlapping text labels with  
652 “ggplot2.” R package version 0. 8. 0.
- 653 Suzek, B.E., Wang, Y., Huang, H., McGarvey, P.B., Wu, C.H., UniProt Consortium, 2015.  
654 UniRef clusters: a comprehensive and scalable alternative for improving sequence  
655 similarity searches. *Bioinformatics* 31, 926–932.  
656 <https://doi.org/10.1093/bioinformatics/btu739>
- 657 Symonds, E.M., Griffin, D.W., Breitbart, M., 2009. Eukaryotic viruses in wastewater samples  
658 from the United States. *Appl. Environ. Microbiol.* 75, 1402–1409.  
659 <https://doi.org/10.1128/AEM.01899-08>
- 660 Wickham, H., 2009. ggplot2: Elegant graphics for data analysis. Springer-Verlag New York.
- 661 Wilder, M.L., Middleton, F., Larsen, D.A., Du, Q., Fenty, A., Zeng, T., Insaf, T., Kilaru, P.,  
662 Collins, M., Kmush, B., Green, H.C., 2021. Co-quantification of crAssphage increases  
663 confidence in wastewater-based epidemiology for SARS-CoV-2 in low prevalence areas.  
664 *Water Res X* 11, 100100. <https://doi.org/10.1016/j.wroa.2021.100100>
- 665 Wood, D.E., Lu, J., Langmead, B., 2019. Improved metagenomic analysis with Kraken 2.  
666 *Genome Biol.* 20, 257. <https://doi.org/10.1186/s13059-019-1891-0>
- 667 World Health Organization, 2021. Global antimicrobial resistance and use surveillance system  
668 (GLASS) report: 2021. World Health Organization.
- 669 Wu, F., Zhang, J., Xiao, A., Gu, X., Lee, W.L., Armas, F., Kauffman, K., Hanage, W., Matus,  
670 M., Ghaeli, N., Endo, N., Duvallet, C., Poyet, M., Moniz, K., Washburne, A.D.,  
671 Erickson, T.B., Chai, P.R., Thompson, J., Alm, E.J., 2020. SARS-CoV-2 titers in  
672 wastewater are higher than expected from clinically confirmed cases. *mSystems* 5,  
673 e00614-20. <https://doi.org/10.1128/mSystems.00614-20>
- 674 Wu, L., Ning, D., Zhang, B., Li, Y., Zhang, P., Shan, X., Zhang, Q., Brown, M.R., Li, Z., Van  
675 Nostrand, J.D., Ling, F., Xiao, N., Zhang, Y., Vierheilig, J., Wells, G.F., Yang, Y., Deng,  
676 Y., Tu, Q., Wang, A., Global Water Microbiome Consortium, Zhang, T., He, Z., Keller,  
677 J., Nielsen, P.H., Alvarez, P.J.J., Criddle, C.S., Wagner, M., Tiedje, J.M., He, Q., Curtis,  
678 T.P., Stahl, D.A., Alvarez-Cohen, L., Rittmann, B.E., Wen, X., Zhou, J., 2019. Global  
679 diversity and biogeography of bacterial communities in wastewater treatment plants. *Nat*  
680 *Microbiol* 4, 1183–1195. <https://doi.org/10.1038/s41564-019-0426-5>
- 681 Xagorarakis, I., O’Brien, E., 2020. Wastewater-based epidemiology for early detection of viral  
682 outbreaks. *Women in Water Quality* 75. [https://doi.org/10.1007/978-3-030-17819-2\\_5](https://doi.org/10.1007/978-3-030-17819-2_5)

- 683 Yang, Y., Li, B., Ju, F., Zhang, T., 2013. Exploring variation of antibiotic resistance genes in  
684 activated sludge over a four-year period through a metagenomic approach. *Environ. Sci.*  
685 *Technol.* 47, 10197–10205. <https://doi.org/10.1021/es4017365>
- 686 Yin, X., Yang, Y., Deng, Y., Huang, Y., Li, L., Chan, L.Y.L., Zhang, T., 2021. An assessment of  
687 resistome and mobilome in wastewater treatment plants through temporal and spatial  
688 metagenomic analysis. *Water Res.* 209, 117885.  
689 <https://doi.org/10.1016/j.watres.2021.117885>
- 690 Zimmer-Faust, A.G., Steele, J.A., Xiong, X., Staley, C., Griffith, M., Sadowsky, M.J., Diaz, M.,  
691 Griffith, J.F., 2021. A Combined digital PCR and next generation DNA-sequencing based  
692 approach for tracking nearshore pollutant dynamics along the southwest United  
693 States/Mexico border. *Front. Microbiol.* 12, 674214.  
694 <https://doi.org/10.3389/fmicb.2021.674214>  
695

| <b>Wastewater Treatment Plant</b>                | <b>Number of Samples</b> | <b>Date Span</b>                  | <b>Approximate Inflow (Million Gallons/Day)</b> | <b>Approximate Population Served</b> |
|--------------------------------------------------|--------------------------|-----------------------------------|-------------------------------------------------|--------------------------------------|
| Escondido Hale Avenue Resource Recovery Facility | 45                       | August 3 2020 – July 19 2021      | 14                                              | 190,000                              |
| Hyperion Water Reclamation Plant                 | 92                       | August 11 2020 – July 29 2021     | 275                                             | 4,000,000                            |
| Joint Water Pollution Control Plant              | 15                       | August 11 2020 – November 17 2020 | 400                                             | 4,800,000                            |
| North City Water Reclamation Plant               | 7                        | August 14 2020 – November 6 2020  | 30                                              | 1,400,000                            |
| Orange County Reclamation Plant #1               | 17                       | August 12 2020 – December 21 2020 | 140                                             | 2,600,000                            |
| Point Loma Water Treatment Plant                 | 77                       | August 13 2020 – August 3 2021    | 175                                             | 2,200,000                            |
| San Jose Creek Water Reclamation Plant           | 15                       | August 12 2020 – November 18 2020 | 100                                             | 1,000,000                            |
| South Bay Water Reclamation Plant                | 7                        | August 13 2020 – November 5 2020  | 15                                              | 107,000                              |

696

697 Table 1. Descriptions of the experiment sampling scheme and relevant information about each

698 WTP.

699 Figure legends:

700

701 Figure 1. Diagram indicating the date ranges of samples separated by wastewater treatment plant  
702 and month. Y-axis codes correspond to abbreviated WTP names: ESC = Escondido Hale Avenue  
703 Resource Recovery Facility, HTP = Hyperion Water Reclamation Plant, JWPCP = Joint Water  
704 Pollution Control Plant, NC = North City Water Reclamation Plant, OC = Orange County  
705 Reclamation Plant #1, PL = Point Loma Water Treatment Plant, SJ = San Jose Creek Water  
706 Reclamation Plant, and SB = South Bay Water Reclamation Plant.

707

708 Figure 2. Stacked bar plots showing the relative abundances of RNA reads mapping to A)  
709 unclassified taxonomic ranks, bacteria, viruses, and archaea; B) AMR genes separated by the ten  
710 most abundant antibiotic classes each gene confers resistance to plus all others; C) ten most  
711 abundant bacterial families plus all others; D) ten most abundant viral species plus all others. All  
712 plots are faceted by WTP and labeled with sampling date.

713

714 Figure 3. Nonmetric multidimensional scaling ordination of Bray-Curtis dissimilarities of AMR  
715 genes at greater than 0.01% relative abundance across A) all WTPs August – November 2020,  
716 and B) ESC, HTP, and PL across August 2020 – August 2021. C) Heatmaps of the  $\log_{10}$ -  
717 transformed counts of differentially abundant non-rRNA AMR genes across all WTPs August –  
718 November 2020, and D) rRNA gene mutations conferring resistance to antimicrobials.  
719 Hierarchical clustering of genes in each heatmap is through the Ward D2 algorithm. E) Bar plots  
720 indicating the non-RNA AMR genes across ESC, HTP, and PL that changed over time and F)

721 AMR rRNA gene mutations. X-axes denote the linear model coefficient of each gene's  
722 relationship to time.

723

724 Figure 4. Nonmetric multidimensional scaling ordination of Bray-Curtis dissimilarities of  
725 bacterial species at greater than 0.01% relative abundance across A) all WTPs August –  
726 November 2020, and B) ESC, HTP, and PL across August 2020 – August 2021. C) Heatmap of  
727 the  $\log_{10}$ -transformed counts of differentially abundant bacterial genera at greater than 0.1%  
728 relative abundance across all WTPs August – November 2020. D) Bar plots indicating the  
729 bacterial genera across ESC, HTP, and PL that changed over time (only genera with a  $P_{\text{adj}} <$   
730 0.001 shown). X-axes denote the linear model coefficient of each genus's relationship to time.

731

732 Figure 5. Nonmetric multidimensional scaling ordination of Bray-Curtis dissimilarities of viruses  
733 at greater than 0.01% relative abundance across A) all WTPs August – November 2020, and B)  
734 ESC, HTP, and PL across August 2020 – August 2021. C) Heatmap of the  $\log_{10}$ -transformed  
735 counts of differentially abundant viruses across all WTPs August – November 2020. D) Bar plots  
736 indicating the viruses across ESC, HTP, and PL that changed over time. X-axes denote the linear  
737 model coefficient of each virus's relationship to time.

738

739 Figure 6. Nonmetric multidimensional scaling ordination of Bray-Curtis dissimilarities of  
740 metabolic pathway transcripts per million across A) all WTPs August – November 2020, and B)  
741 ESC, HTP, and PL across August 2020 – August 2021. C) Bar plots indicating the metabolic  
742 pathway at greater than 0.01% relative abundance across ESC, HTP, and PL that changed over

743 time. X-axes denote the linear model coefficient of each metabolic pathway's relationship to  
744 time.

745

746 Supplemental file legends:

747

748 Supplemental file SF1: Sample metadata.

749

750 Supplemental file SF2: ANCOM analyses outputs. Includes Wald scores, significance testing,  
751 and bacterial genus, virus, or ARO term being tested.

752

753 Supplemental file SF3: MaAsLin2 outputs. Includes linear model coefficients of proportional  
754 abundances over time, standard errors, sample N included and excluded, P-value, and Q-value  
755 for each bacterial genus, virus, ARO term, and HUMAnN3 pathway. Individual scatterplots for  
756 each term being tested are available on Zenodo at ([doi.org/10.5281/zenodo.6829029](https://doi.org/10.5281/zenodo.6829029)).



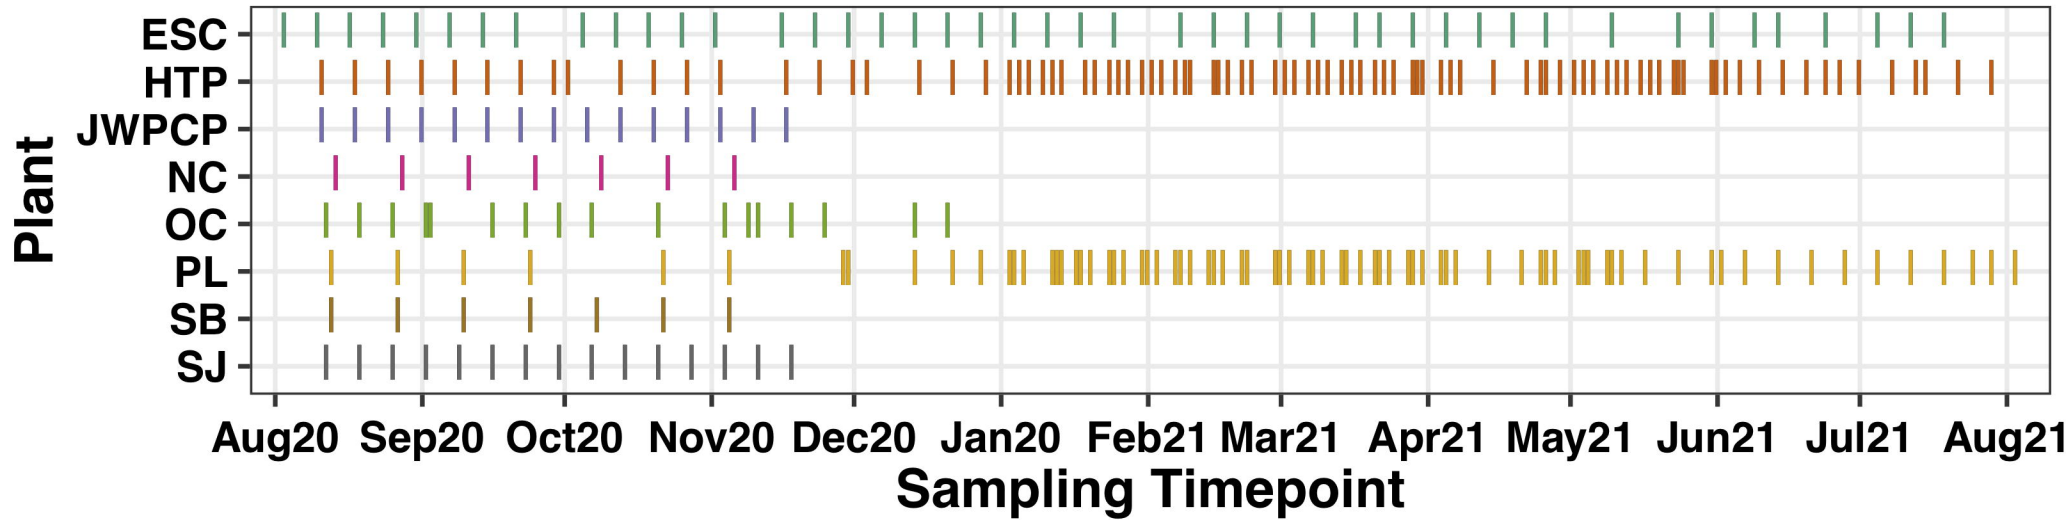

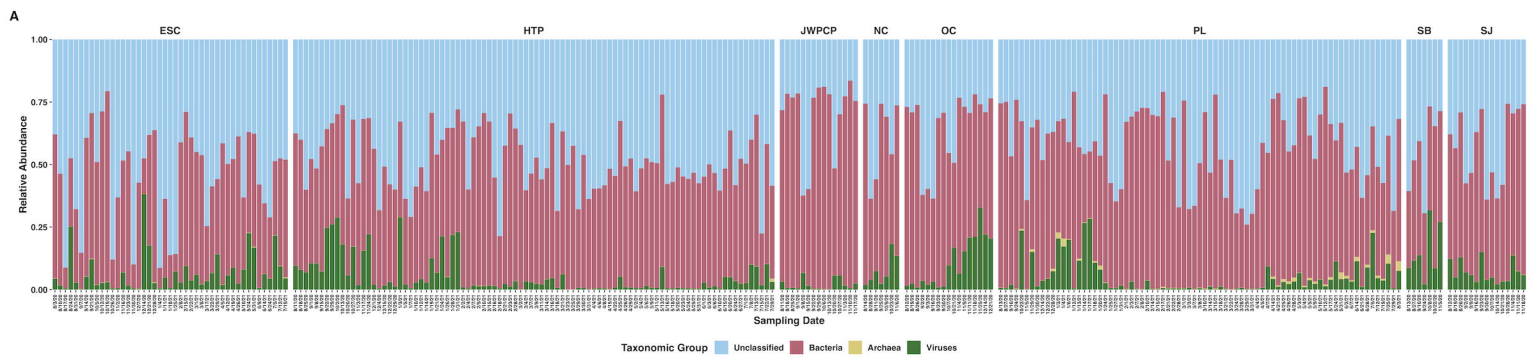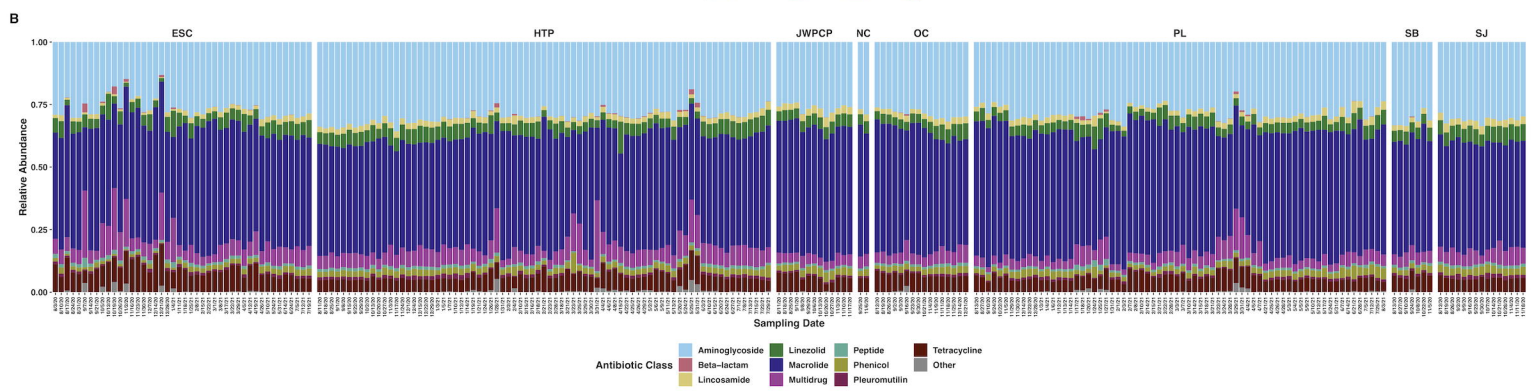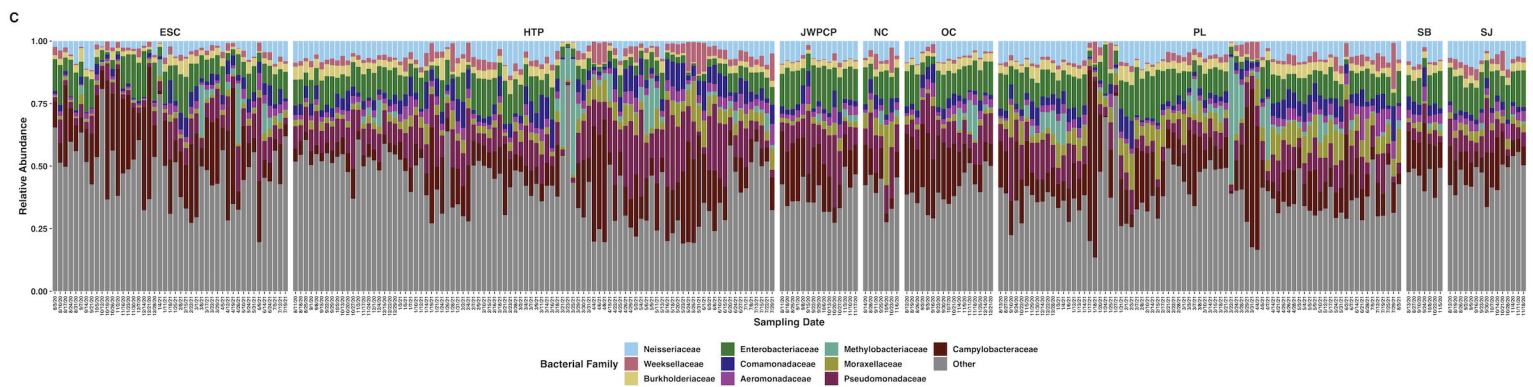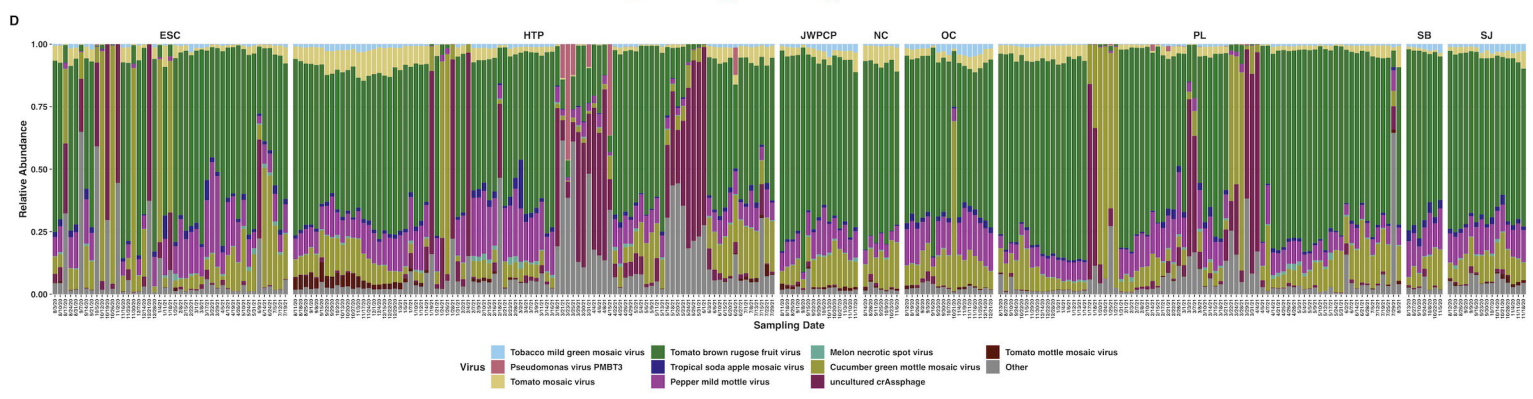

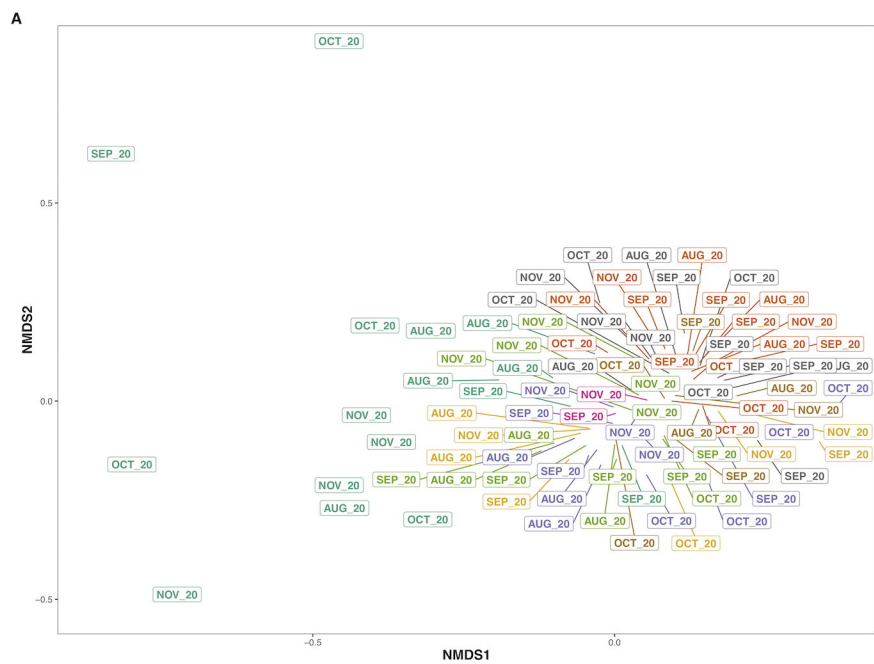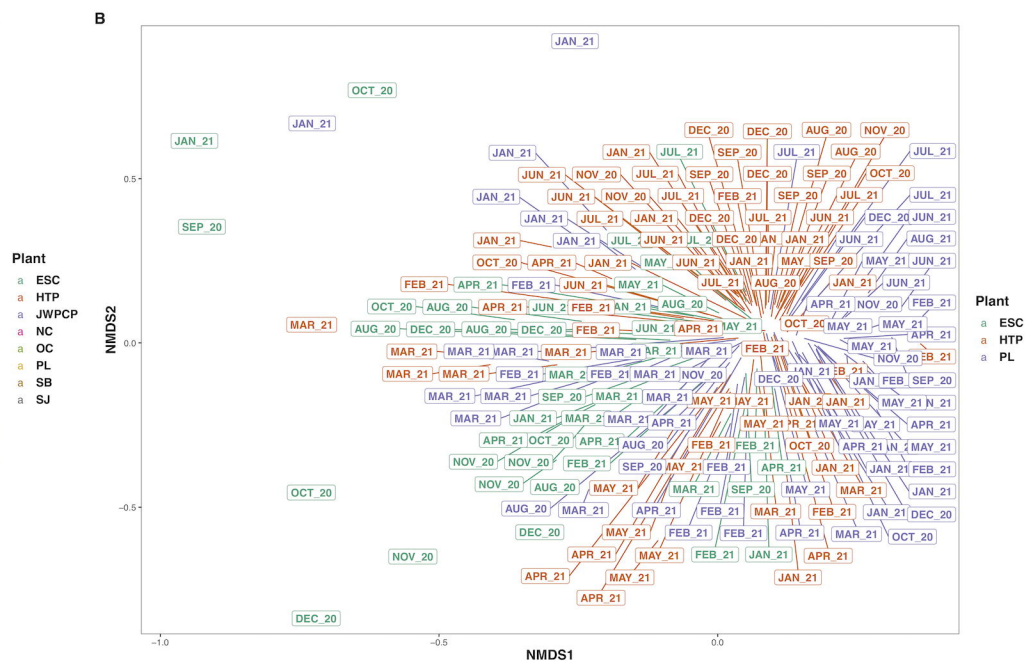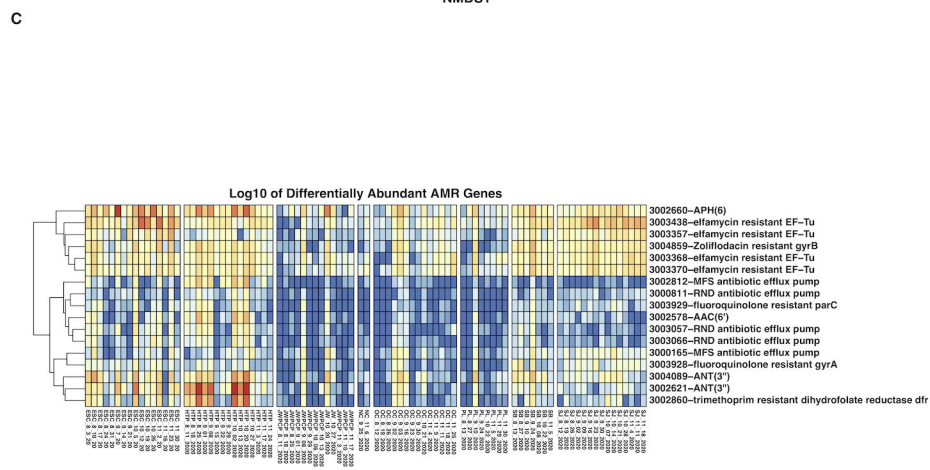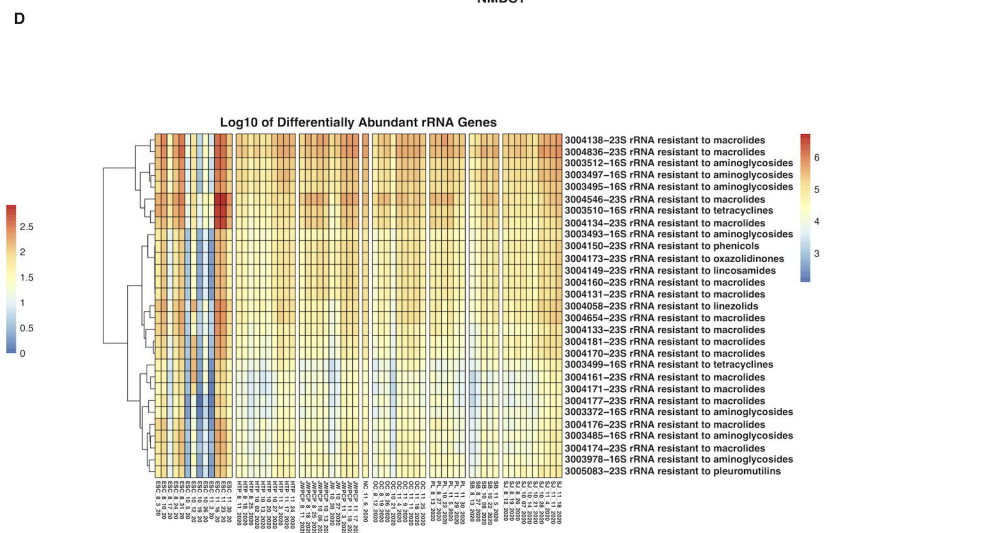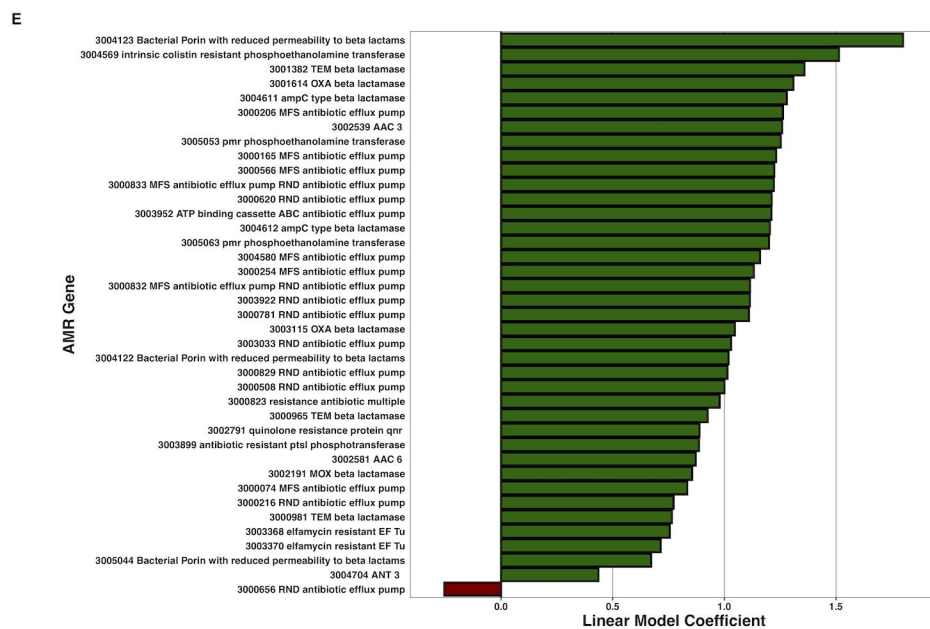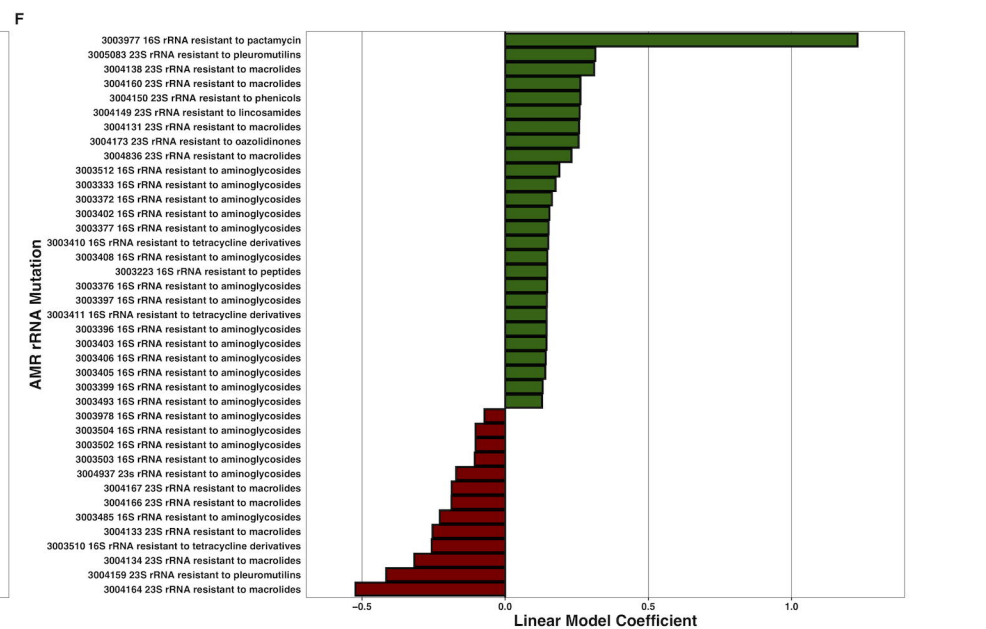

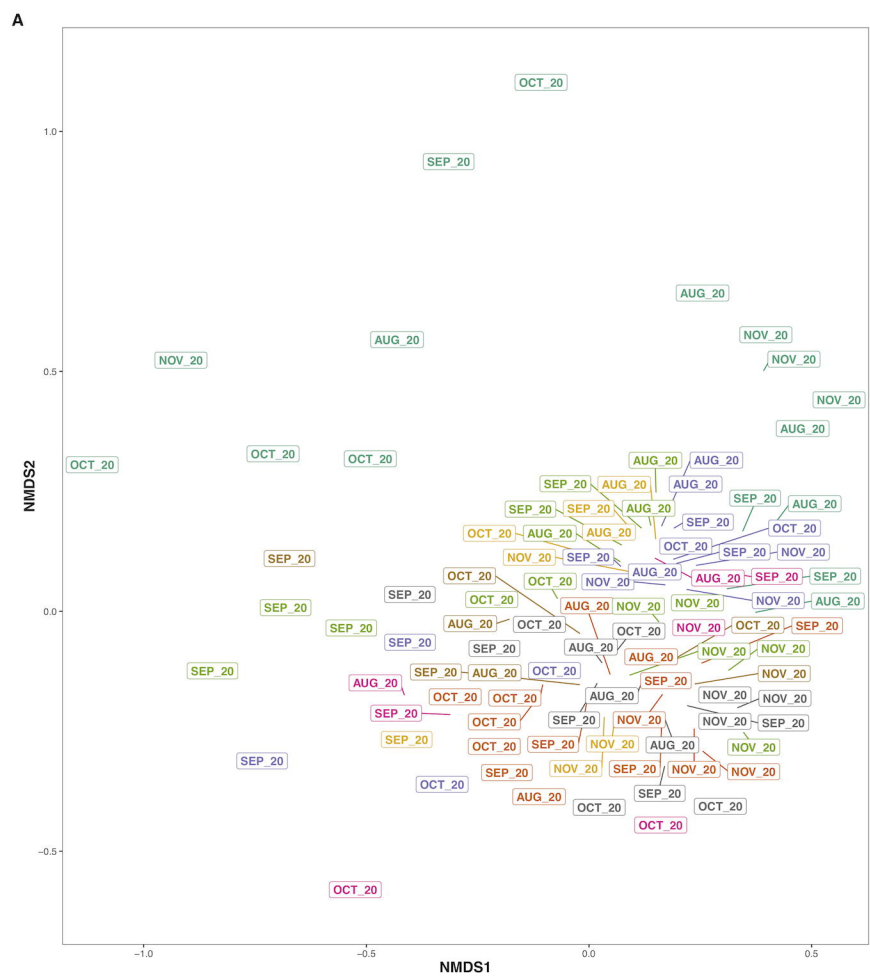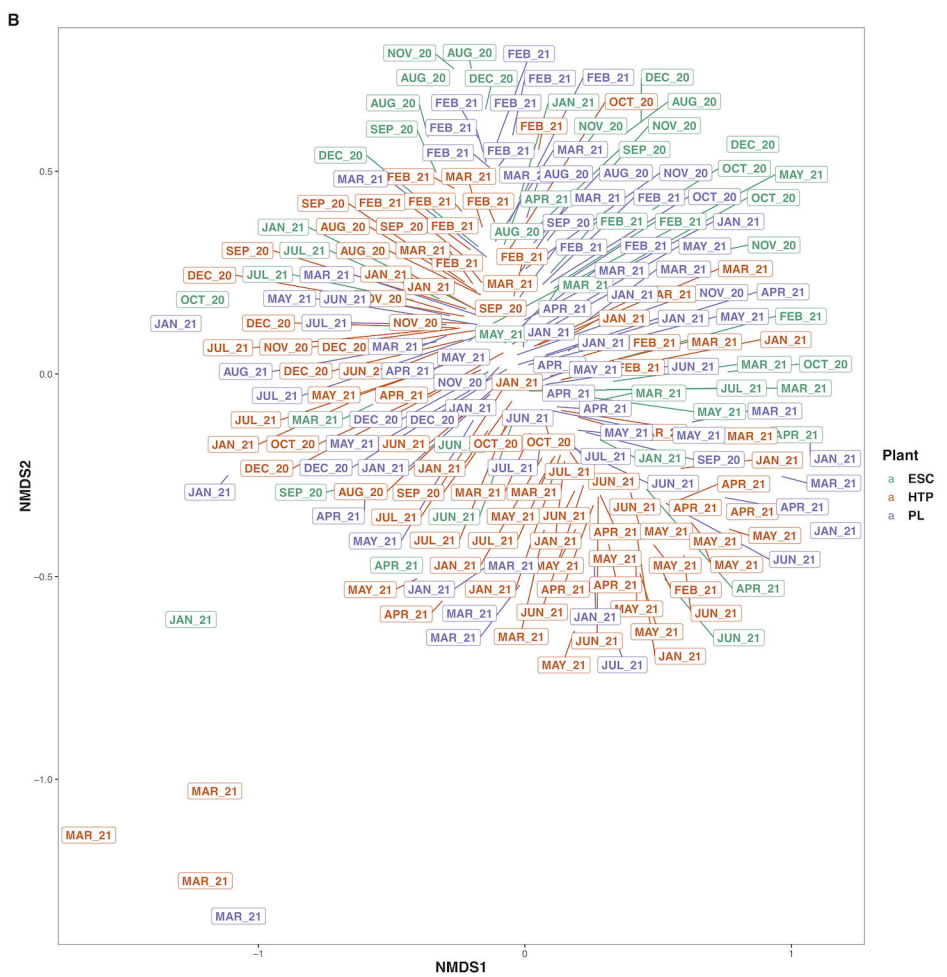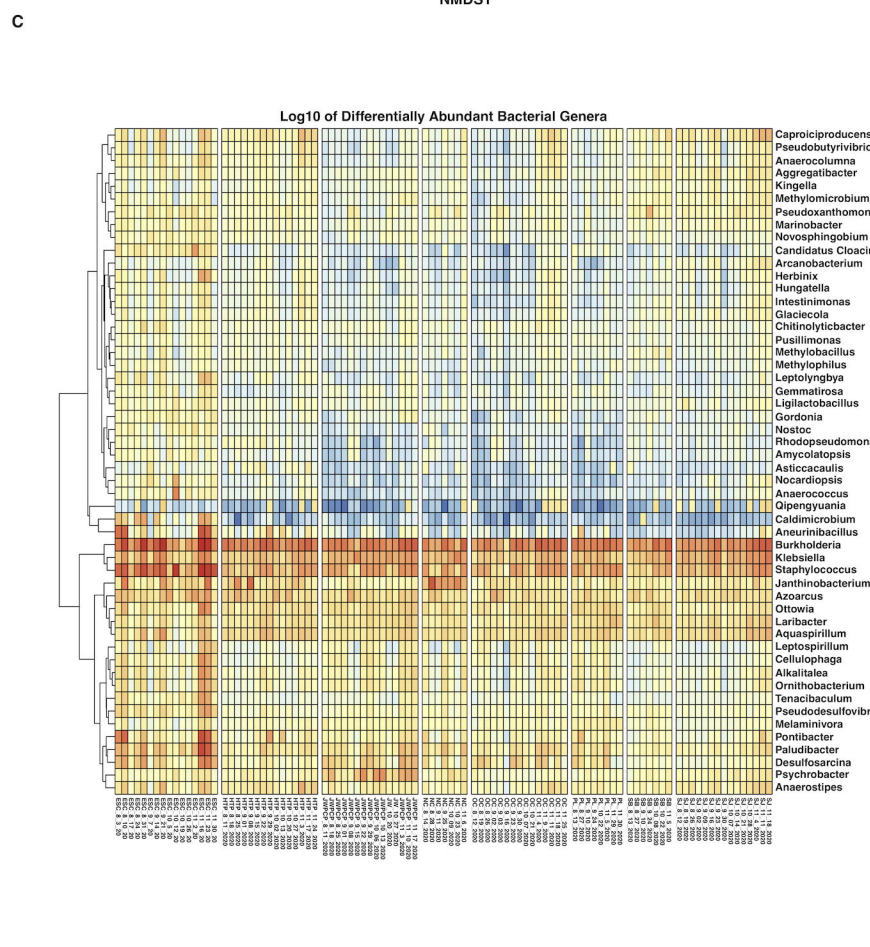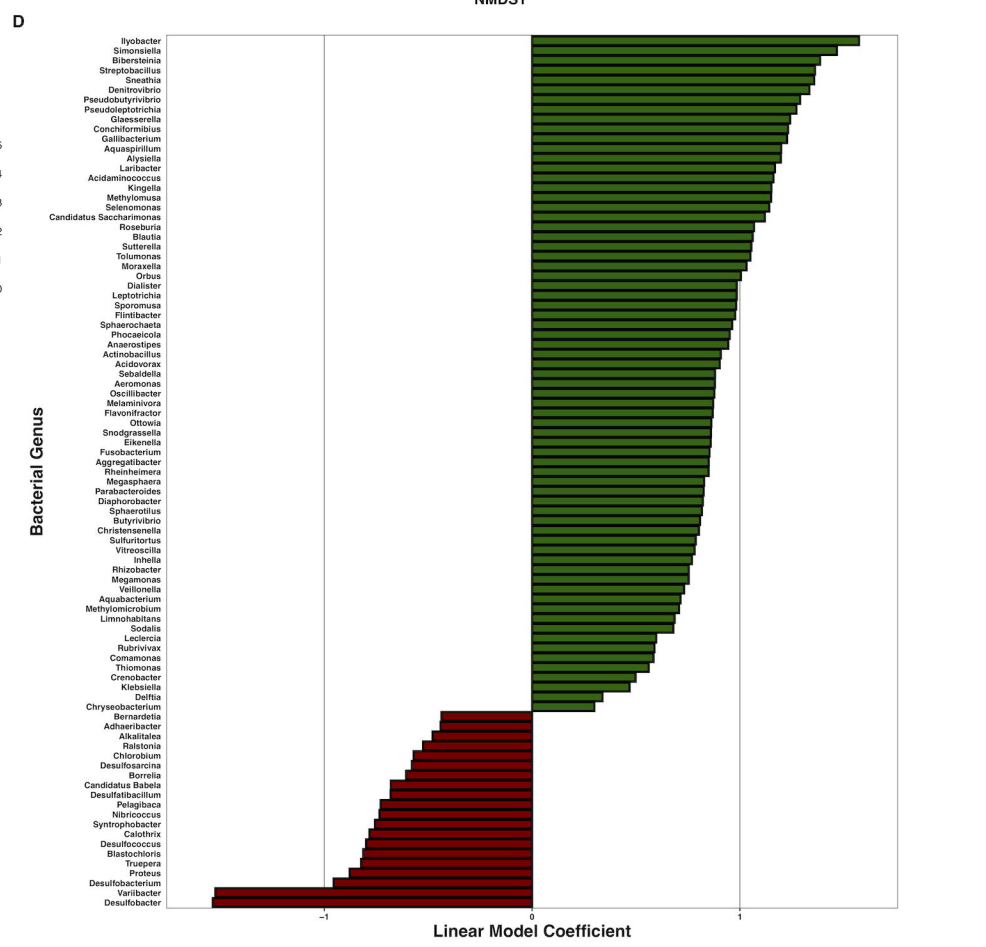

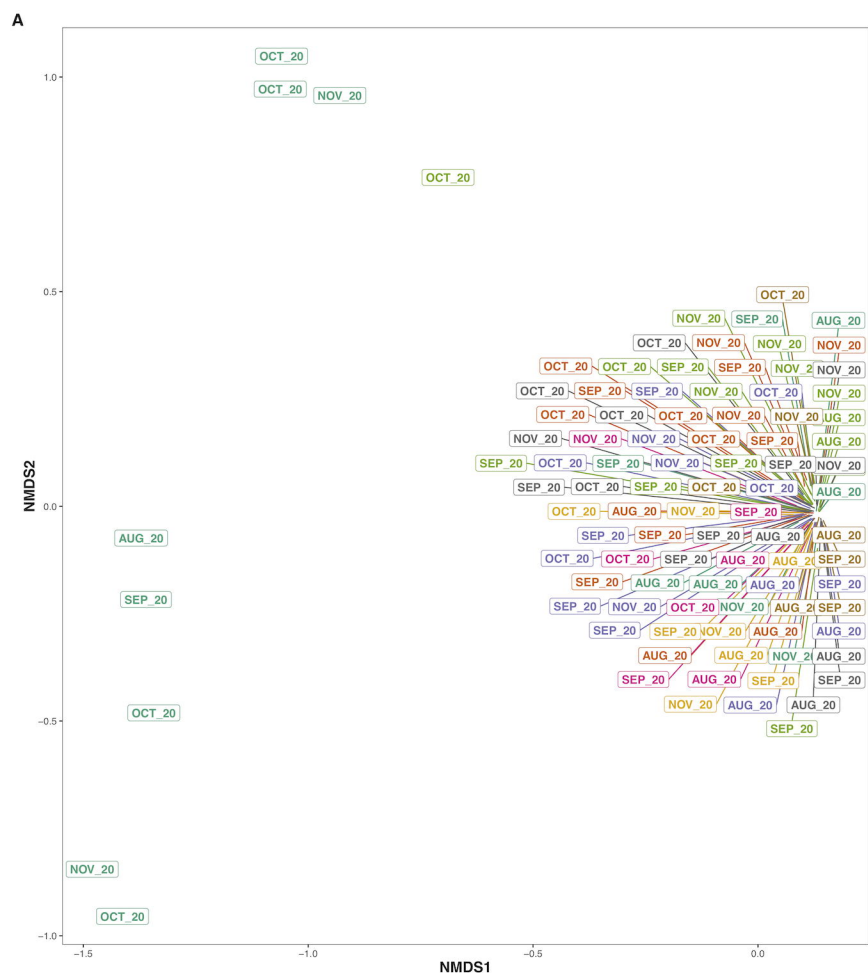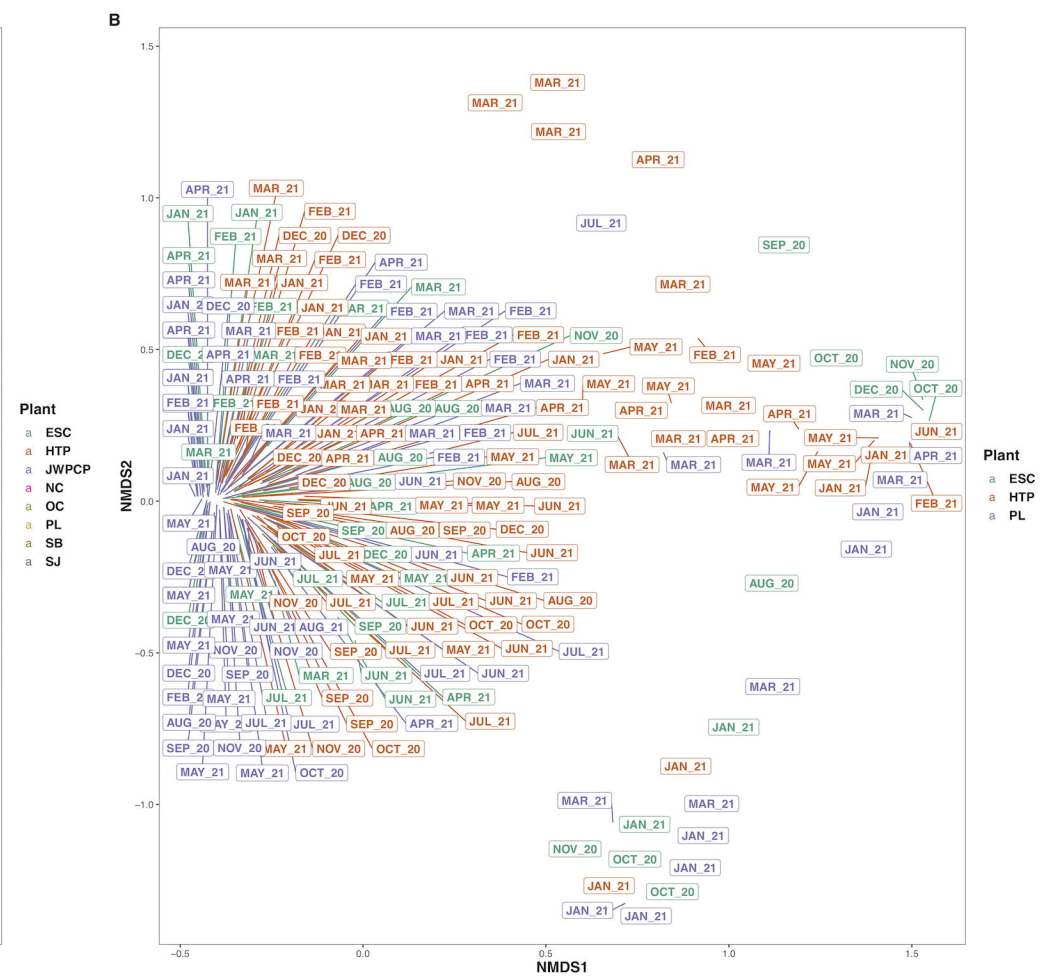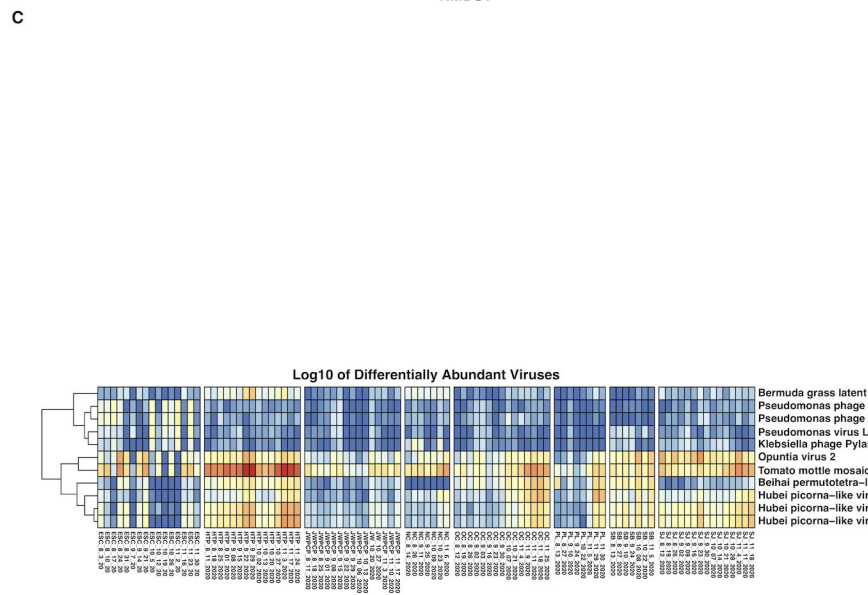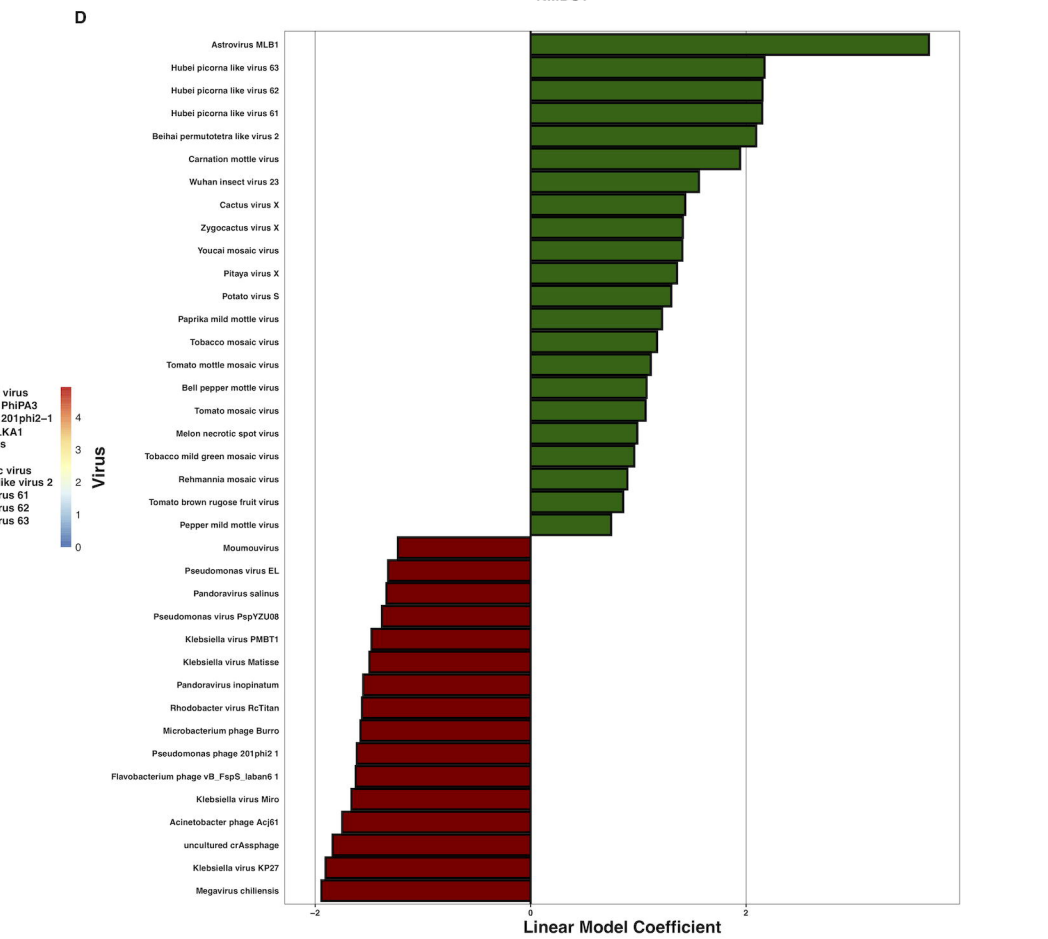

A

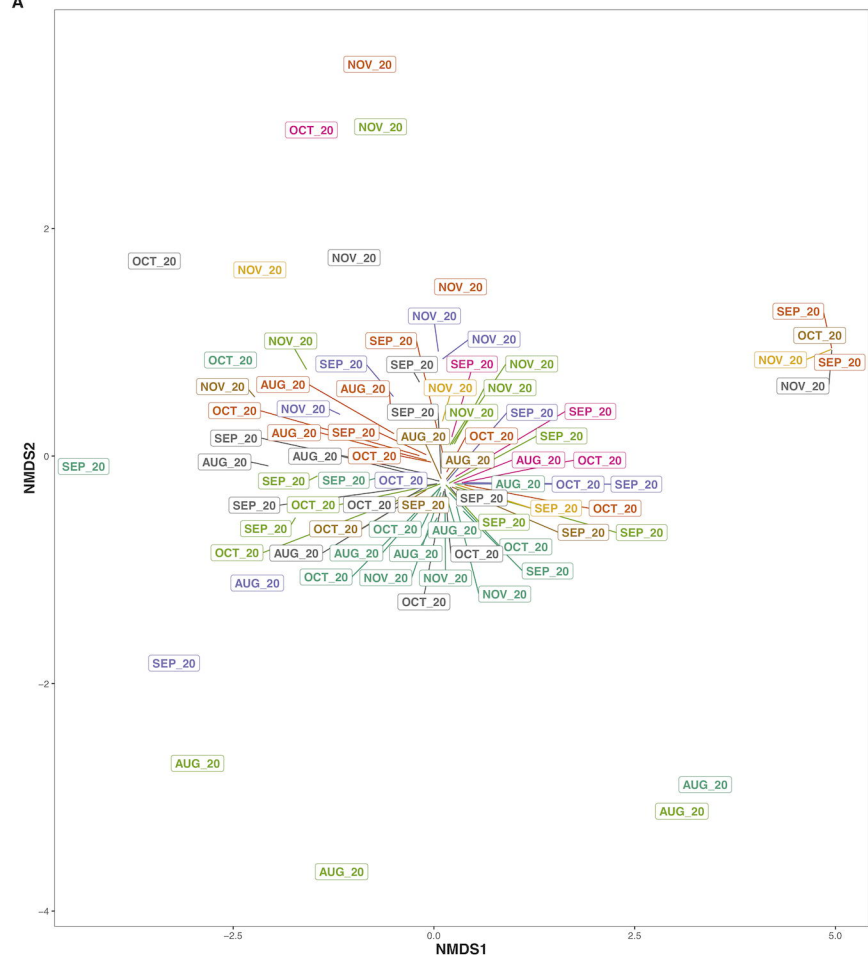

B

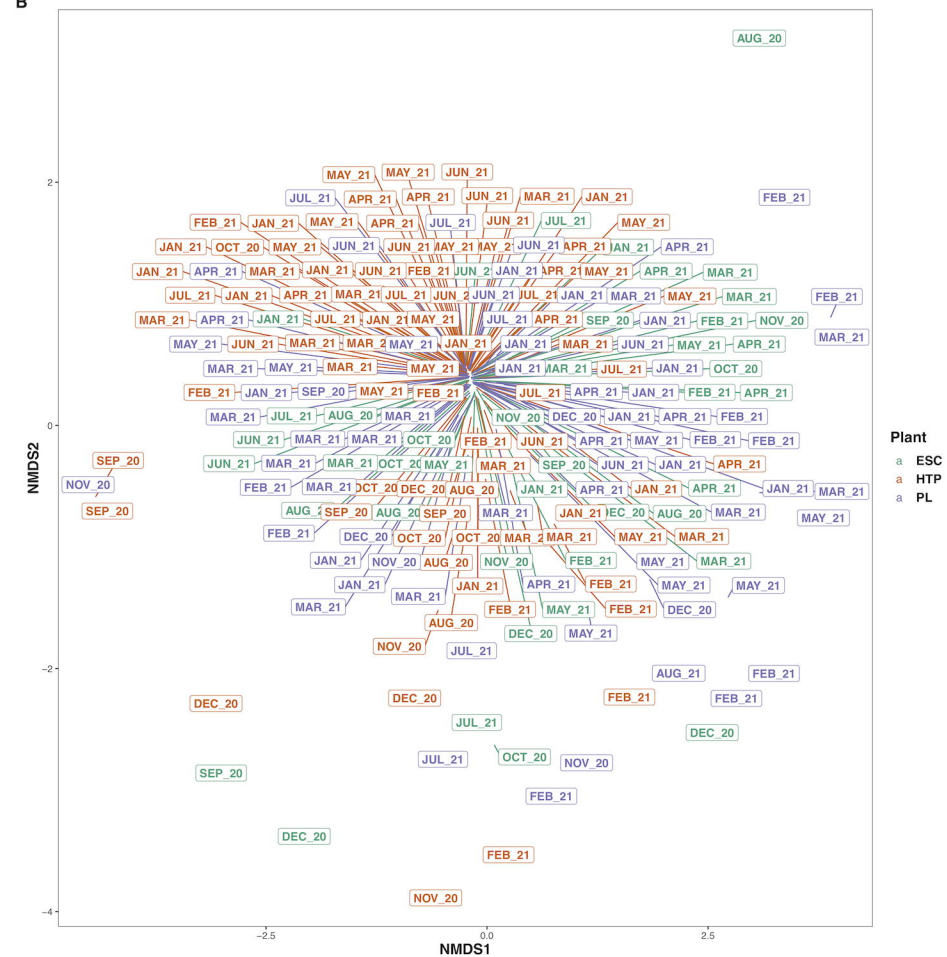

C

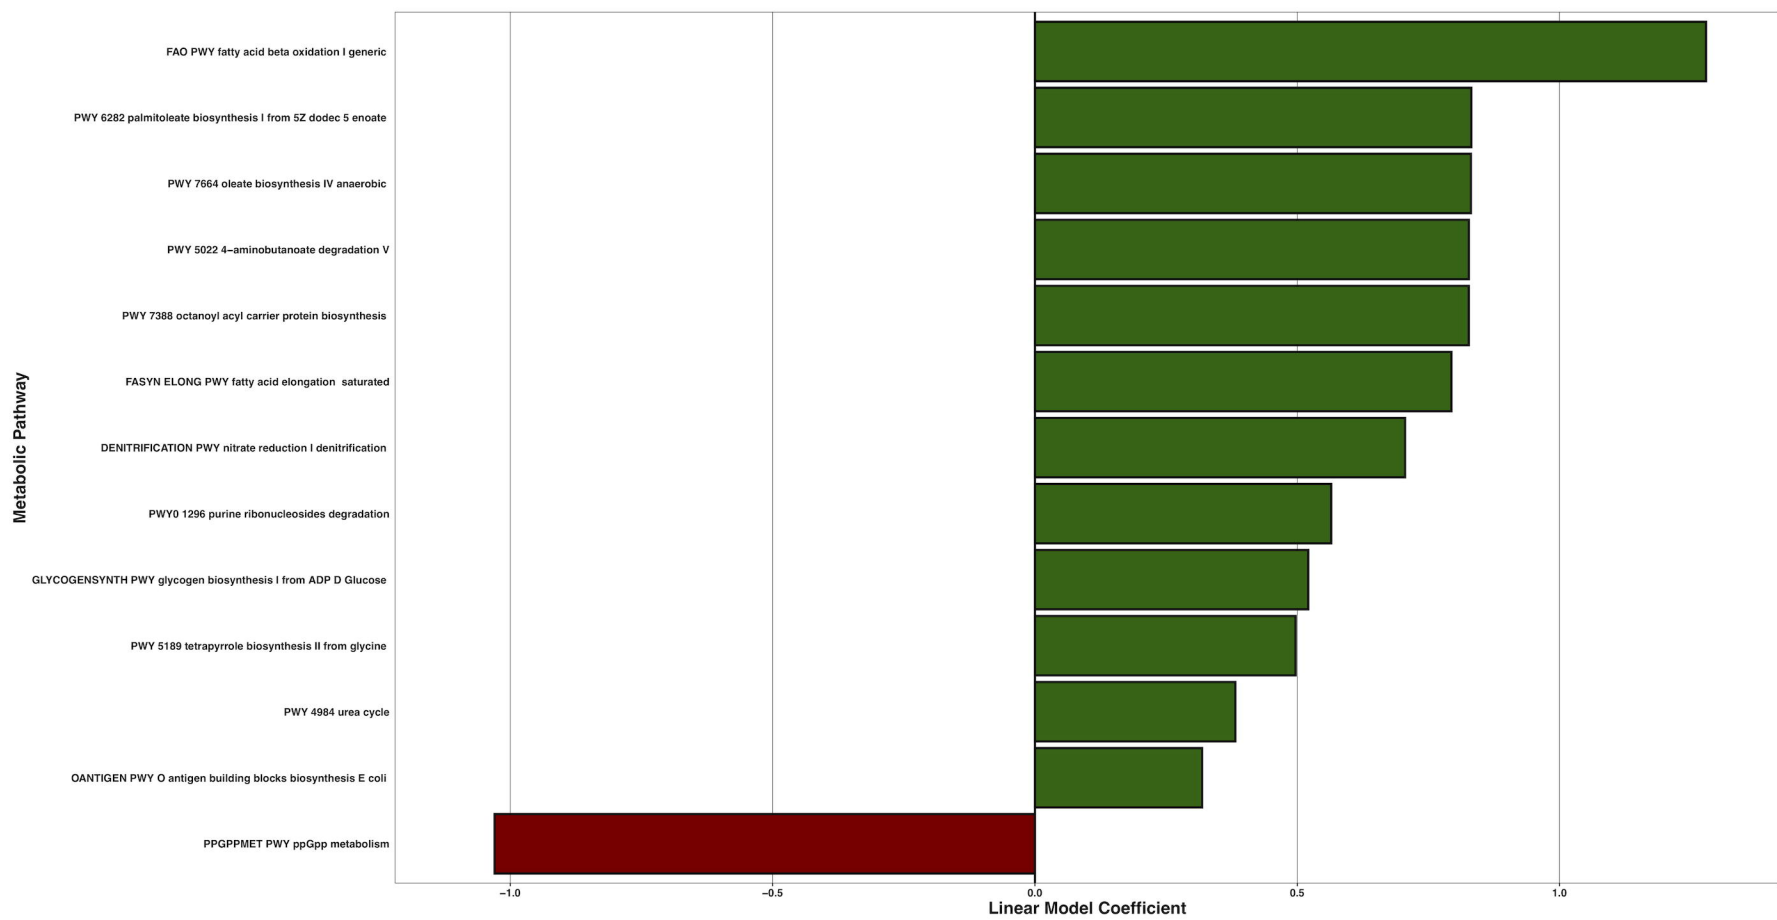

Source: https://www.biorxiv.org/content/10.1101/2022.08.02.502560v1.full.pdf
